# Supplementary material for: Recent historical bottlenecks and restricted gene flow in one of the last remaining stronghold populations of the southern black-throated finch (Poephila cincta cincta)
Source: Research Square preprint supplement (doi:10.21203/rs.3.rs-6780931/v1), 2025-06-10
Supplement: Supplementary file 1 [file 599ad9a02a2fb1763ed93001.docx]

Electronic Supplementary Material: Recent historical bottlenecks and restricted gene flow in one of the last remaining stronghold populations of the southern black-throated finch

Skye Davis1* (ORCID: 0000-0002-8488-0345); Adam J Stow1 (ORCID: 0000-0002-6796-4854); Jemma McCrossin2 (ORCID: 0009-0002-0208-7421); Wilbur Ashley1; John M. van Osta2,3 (ORCID: 0000-0001-6196-1241); Brad Dreis2,3 (ORCID: 0009-0007-3315-3395); Simon Griffith1 (ORCID: 0000-0001-7612-4999).

School of Natural Sciences, Faculty of Science and Engineering, Macquarie University, Macquarie Park, NSW 2109, Australia
2 E2M Pty Ltd, Milton, QLD 4064, Australia
3 School of Environment and Science, Griffith University, Gold Coast, QLD 4215, Australia

*Corresponding author: [k.skye.davis@outlook.com](mailto:k.skye.davis@outlook.com)

# Supporting Methods: Filtering


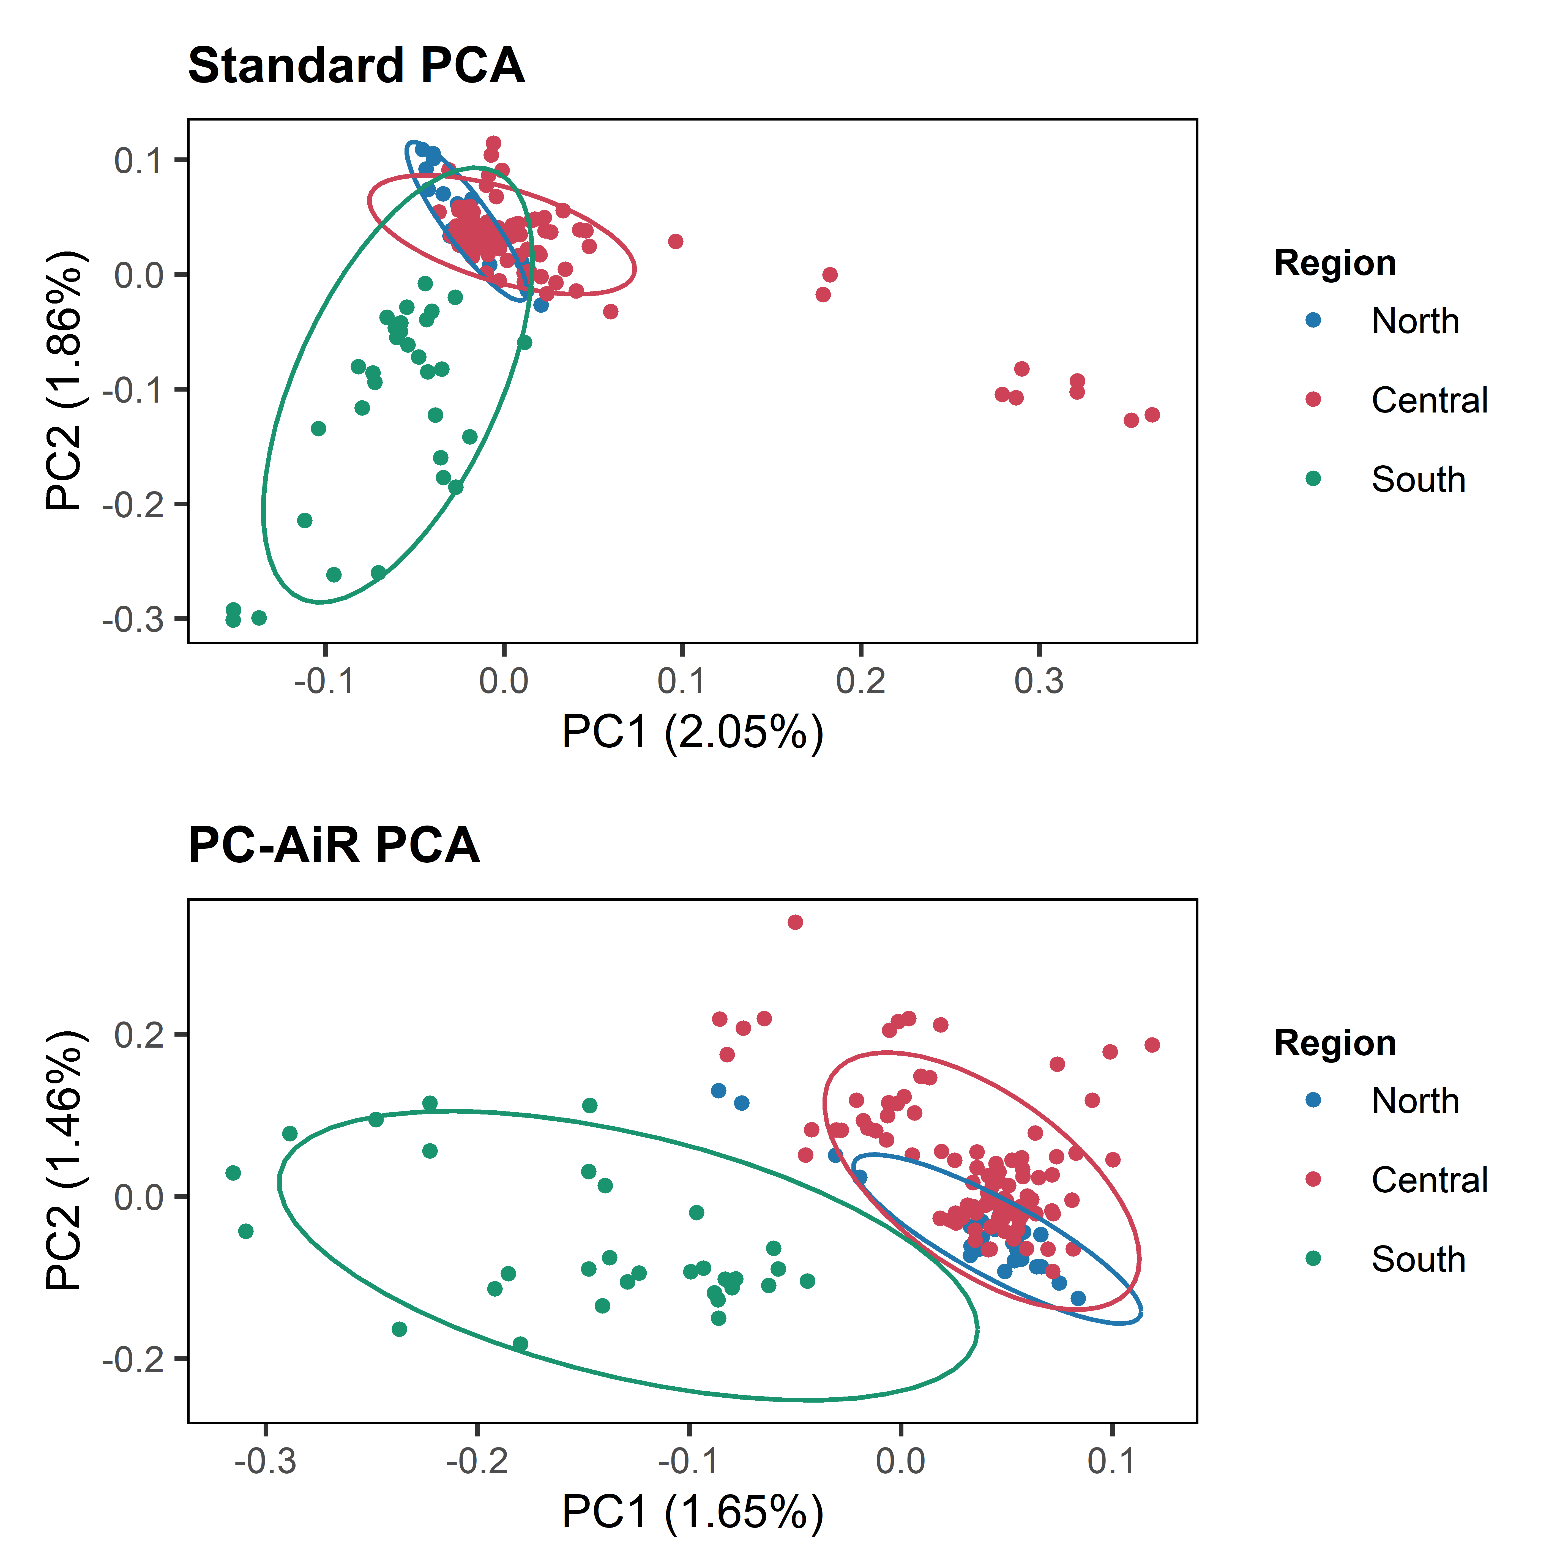


**Figure S1.** Impact of removing close relatives on a principal component analysis (PCA), showing a PCA with all samples and a PC-AiR PCA accounting for close relatives in the dataset. Points represent individual samples and are coloured by region (North, Central and South).

# Supporting Methods: Sex inference

For sex inference, loci were mapped to the Z and W chromosomes of the zebra finch (*Taeniopygia guttata*) (RefSeq assembly GCF_003957565.2) using the function ‘gl.blast’ in *dartR*. Mapped sequences were filtered to retain those with percent identity > 80%, E-value < 1e-10, retaining only one SNP per RAD tag, reproducibility > 0.98, loci located in pseudoautosomal regions or mapping to both Z and W chromosomes. The length of pseudoautosomal region 1 (PAR1, the tip of the short arm of W and Z chromosomes) and PAR2 (tip of the long arm) were approximated as maximum 0.9 Mb in length. This is a conservative estimate, as PAR1 on the Z chromosome is up to 0.9 Mb in several passerines including great reed warblers (Acrocephalus arundinaceus) and zebra finch (Sigeman et al., 2021). For example, PAR1 is estimated to be 0.63 Mb in collard flycatchers (*Ficedula albicollis*) (Smeds et al., 2014).

For each sample, three sex-associated features were calculated: W missing rate (proportion of W-linked loci with missing data), Z/W ratio (ratio of Z-linked loci to W-linked loci, excluding missing data), Z heterozygosity (proportion of Z-linked loci that were heterozygous for each sample, excluding missing data). Each measure was standardized against the overall missing rate for each sample. Sex was inferred with the model-based clustering function ‘Mclust’ from *mclust* v 6.0.0 (Scrucca et al., 2016), with the expectation-maximisation (EM) algorithm. Samples were clustered into two groups (male or female) if uncertainty was < 0.1. Males (ZZ) were expected to have higher W missing rates, Z/W ratios and Z heterozygosity. Sex-linked loci were identified (and sex confirmed) using the R functions ‘filter.sex.linked’ and ‘infer.sex’ with the ‘zw’ system (Robledo‐Ruiz et al., 2023), with uncertain samples initially excluded for detecting sex-linked loci. Samples with inconclusive sex were excluded from all downstream sex-based analyses.


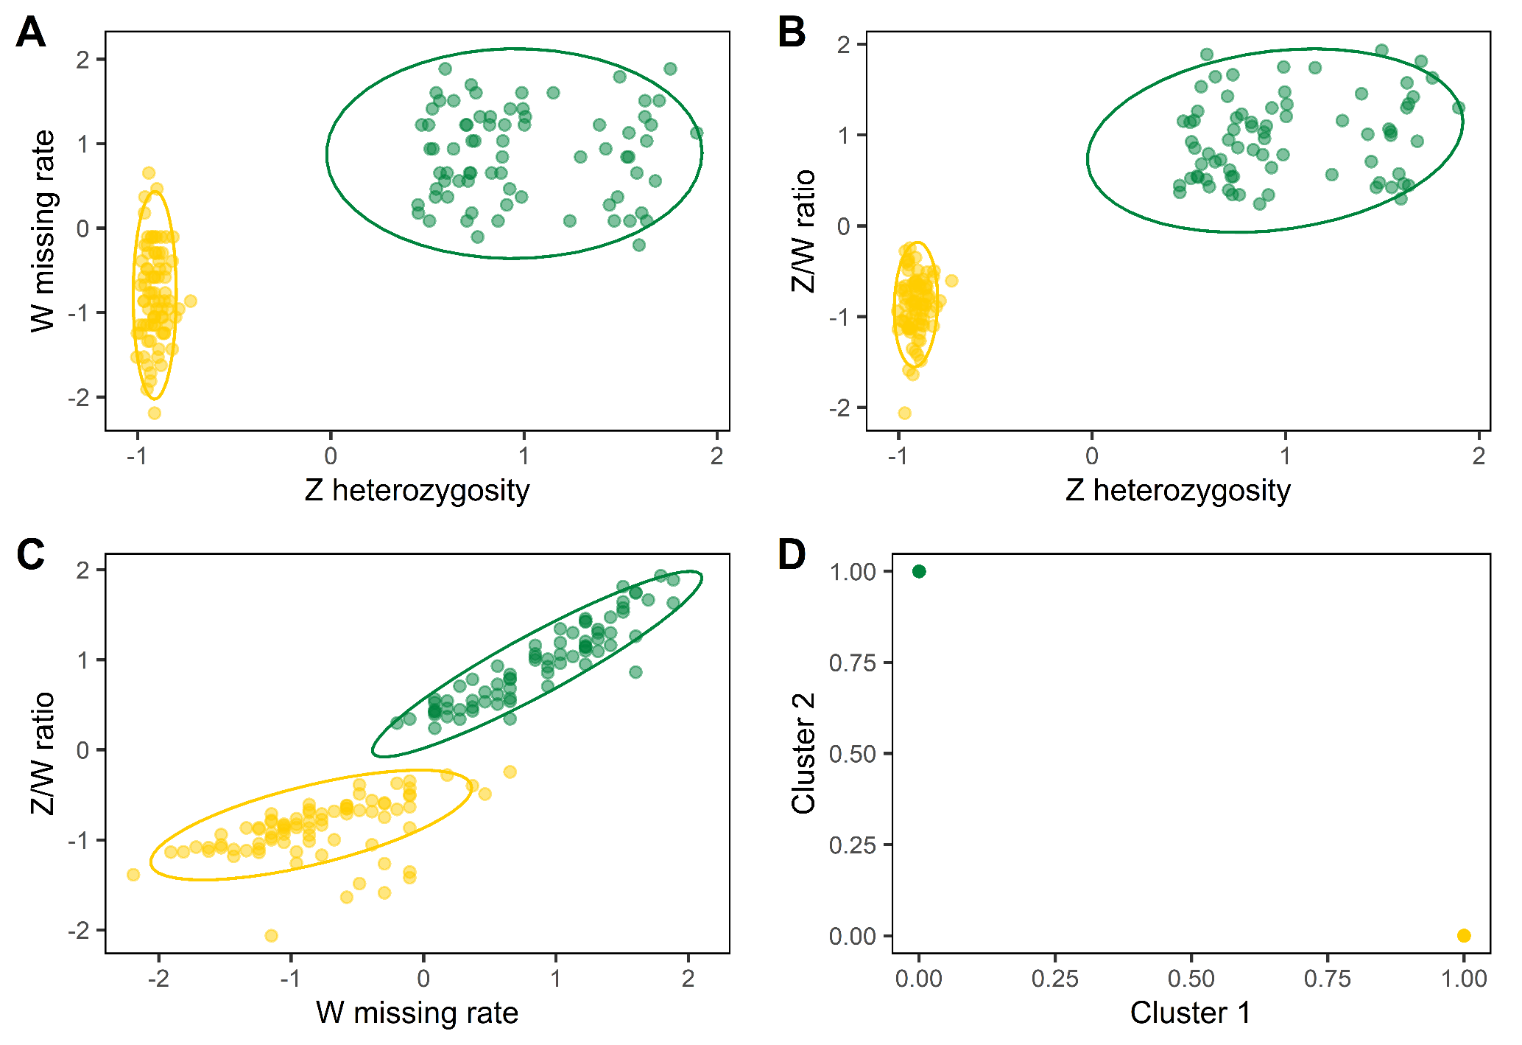


**Figure S2.** Sex inference results for black-throated finches. A-C) correlations between pairs of sex-associated features used in the analysis, coloured by sex inferred with *mclust* clustering method (green = males, yellow = females). D) Assignment probability of samples to each cluster (cluster 1 = female, cluster 2 = male).

# Supporting Methods: ResistanceGA

Ten landscape variables were chosen to assess the impact of each variable on inter-individual genetic distance in *ResistanceGA*, details provided in Table S13. For each landscape layer, rasters were reclassified to the values listed in Table S13 using QGIS v 3.10.14-A Coruña (Open-Source Geospatial Foundation, OSGeo). Rasters were then clipped to a 15km buffer around all sampling locations and reprojected to a resolution of 250 meters to reduce computational load. A radio tracking study of BTFS around the Carmichael Coal Mine suggests finches rarely make long-distance movements greater than 4.5 km, and exhibit home range sizes around 176 to 319 hectares (van Osta et al., 2024). Thus, the resolution chosen is well-below the dispersal capacity of BTFS. Sample coordinates were adjusted to ensure no more than one sample occupied an individual cell in the raster layer, by moving any overlapping samples to the nearest available cell with QGIS.

**Table S1.** Details on the seven landscape variables (four continuous and three categorical) chosen to test for isolation by resistance among black throated finch around the Carmichael Coal Mine. All landscape rasters were reclassified to the raster values indicated below, reprojected to a resolution of 250 meters and clipped to a 15km buffer around the sampling locations.

| Code | Landscape variable | Description | Raster values |
| --- | --- | --- | --- |
| *Continuous variables* | | | |
| DB | Dry Season Water & Bores | Minimum Euclidian distance from perennial water sources (bores, dams, waterholes and permanent natural water only) during the dry season, based on 2015 data (van Osta et al., 2024). | Euclidian distance in meters. |
| DE | Dry Season Bare Earth | Dry season (Spring 2020) bare earth, calculated as the percentage of bare ground fraction (soil or rock) + 100. <https://knowledge.dea.ga.gov.au/data/product/dea-fractional-cover-landsat/> | 0 to 100% (+ 100), where 100% represents completely bare earth (soil and rock only, no vegetation). |
| WB | Wet Season Water & Bores | Minimum Euclidian distance from all water sources (bores, dams, waterholes, ephemeral and permanent natural water) during the wet season, including ephemeral water sources, based on 2015 data (van Osta et al., 2024). | Euclidian distance in meters. |
| WE | Wet Season Bare Earth | Wet season (Autumn 2021) bare earth, calculated as the percentage of bare ground fraction + 100. | 0 to 100% (+ 100), where 100% represents completely bare earth (soil and rock only, no vegetation). |
| *Categorical variables* | | | |
| CC | Canopy Cover | Percentage of tree canopy cover assigned to six classes. | 1) 0% (no trees)  2) > 0% to 6% (scattered trees)  3) 6% to 11% (open woodland)  4) 11% to 30% (woodland)  5) 30% to 70% (open forest)  6) > 70% (closed forest) |
| CH | Canopy Height | Tree canopy height in meters assigned to five classes. | 0) No trees  1) 9m (low)  2) 9m to 17m (medium)  3) 17m to 27m (tall)  4) 27m to 57m (very tall)  5) > 57m (extremely tall) |
| HS | Habitat suitability | Suitability of vegetation communities as BTF habitat.  **Suitable:** Eucalypt dominated vegetation on alluvial soils, Eucalypt dominated woodland on paleo-alluvial sediments, Eucalypt/*Acacia* dominated vegetation on metamorphosed sediments.  **Not Suitable:** *Acacia* dominated vegetation on heavy clay soils, Eucalypt/*Acacia*/*Melaleuca* dominated vegetation on skeletal soils, native grassland and non-remnant. | 1) Not suitable  2) Suitable |


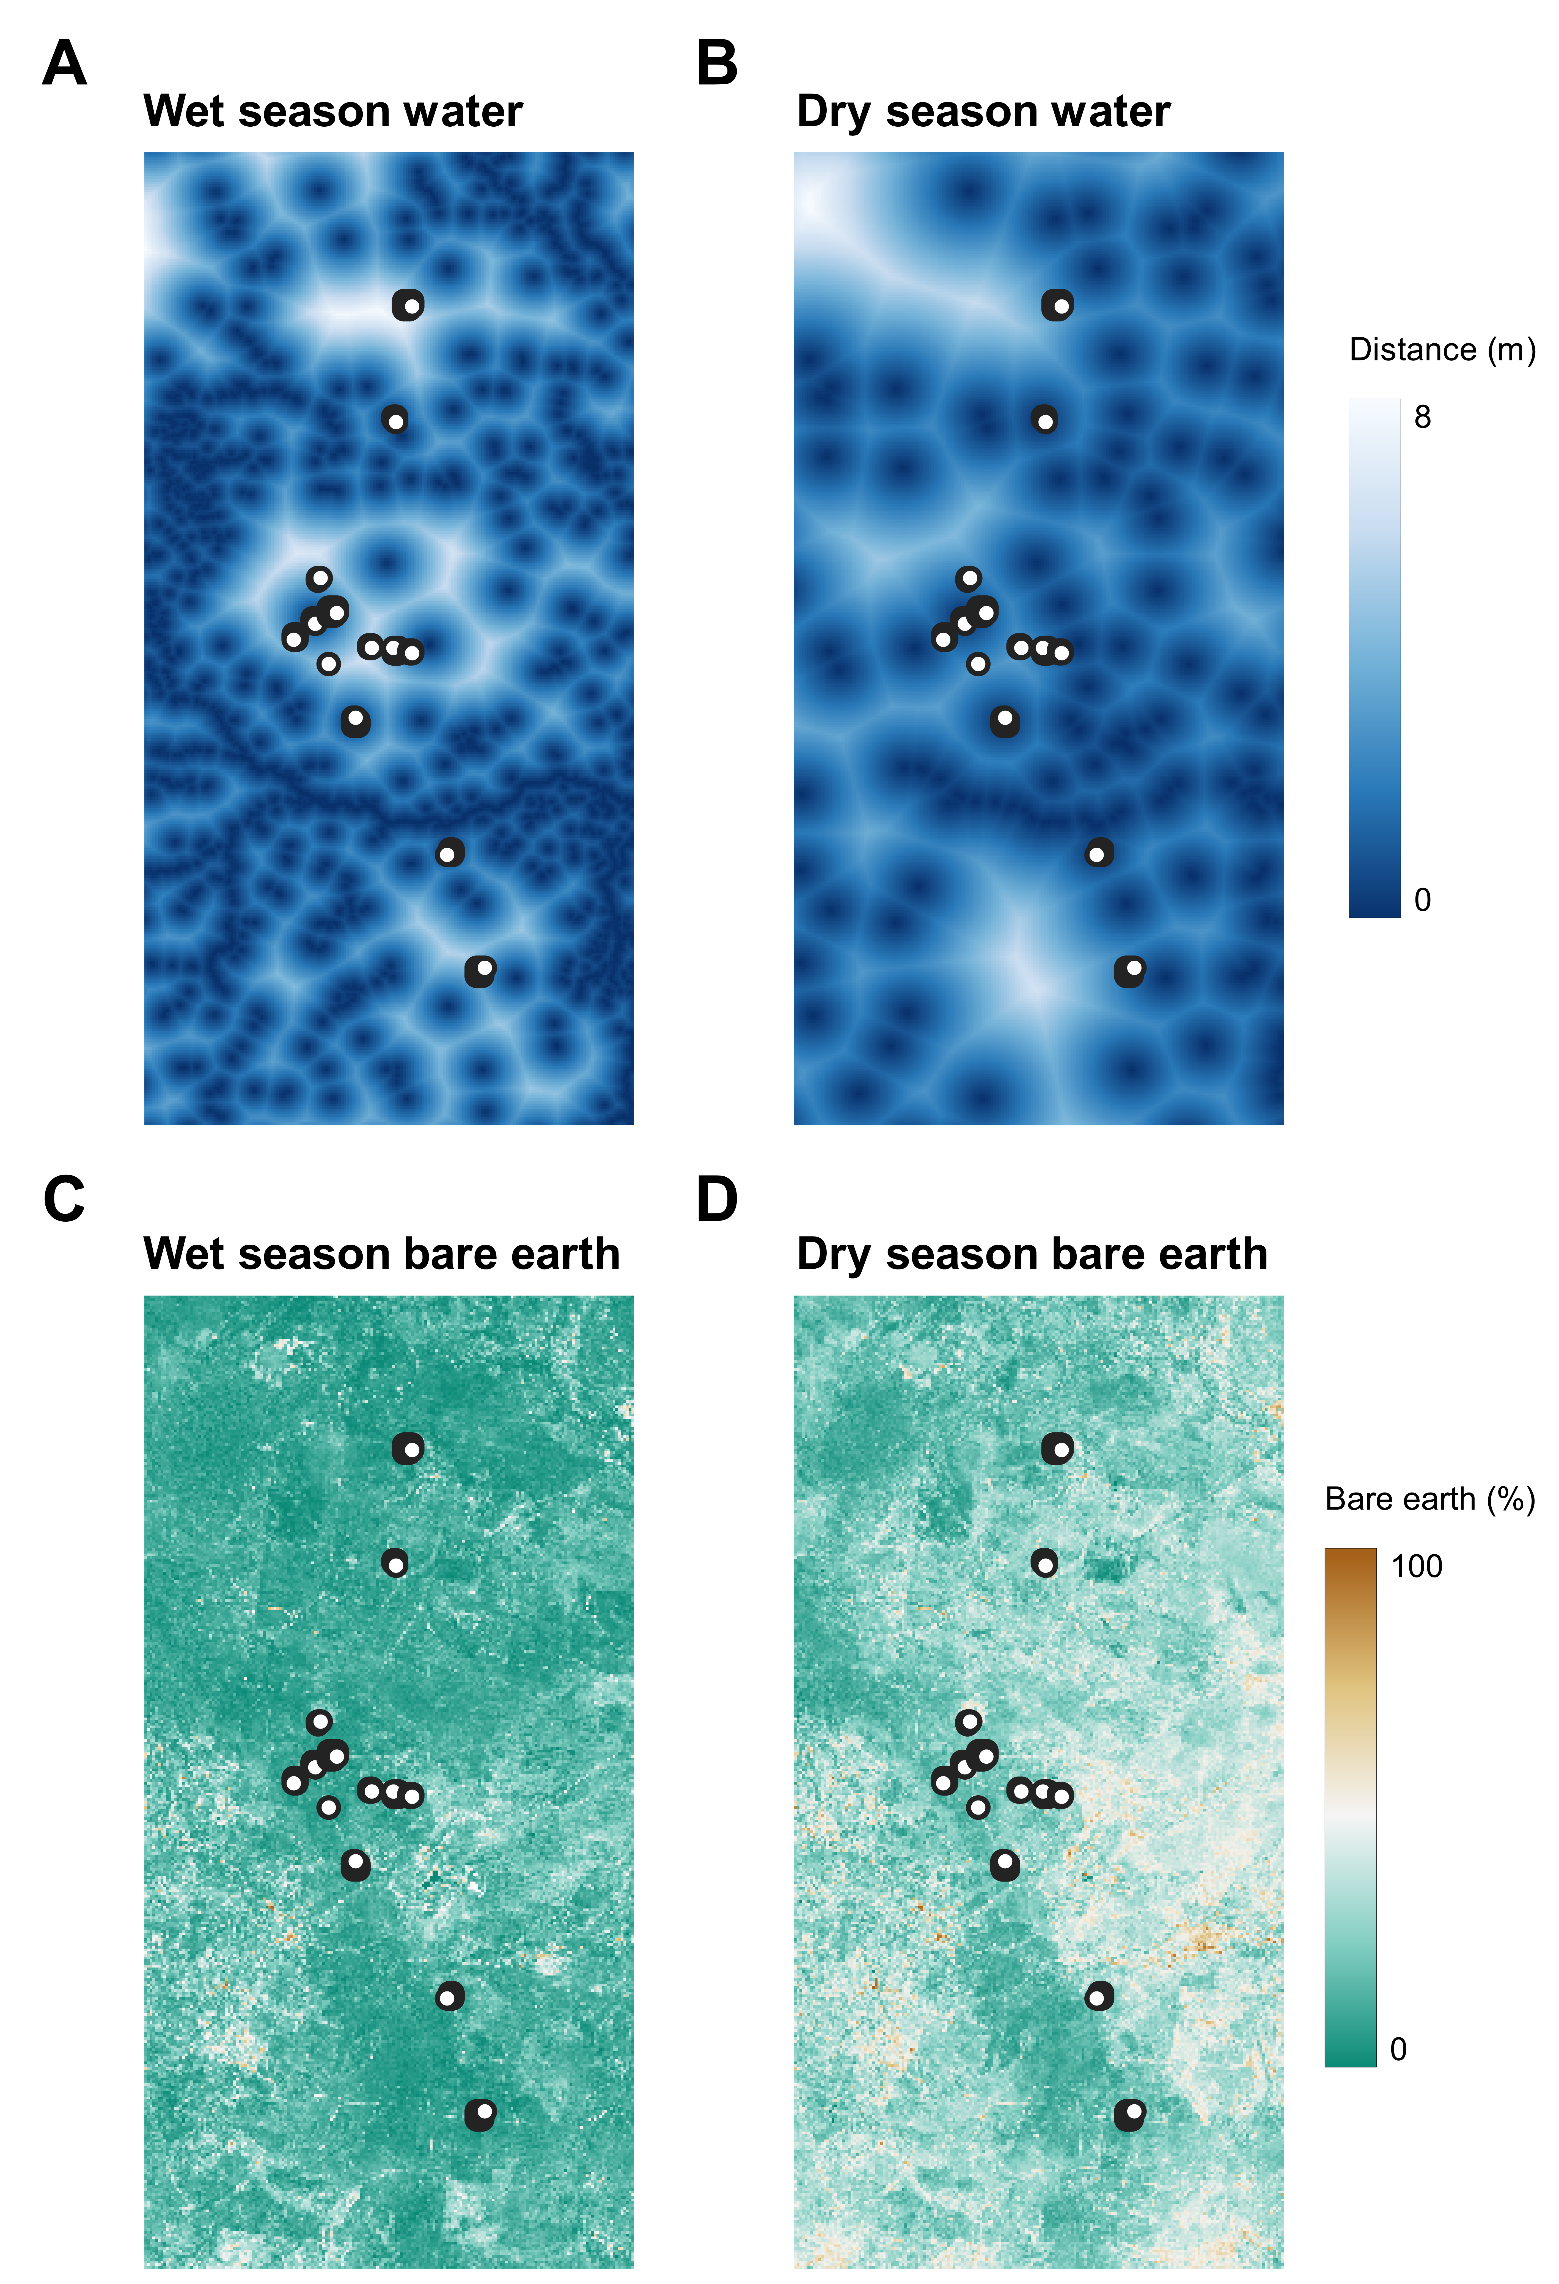


**Figure S3.** Continuous landscape variables used in the *ResistanceGA* analysis to identify barriers to gene flow across the landscape for southern black-throated finch subpopulations around the Carmichael Coal Mine (white circles indicate sample locations). A-B) Dry and wet season landscape layers represent the Euclidian distance to the nearest bore, dam or natural water source (only permanent natural water sources for the dry season layer). C-D) Dry and wet season bare earth represents the % of bare earth (rock or soil, no vegetation) per cell. All landscape layers have a 15km buffer around samples and a 250 m resolution.


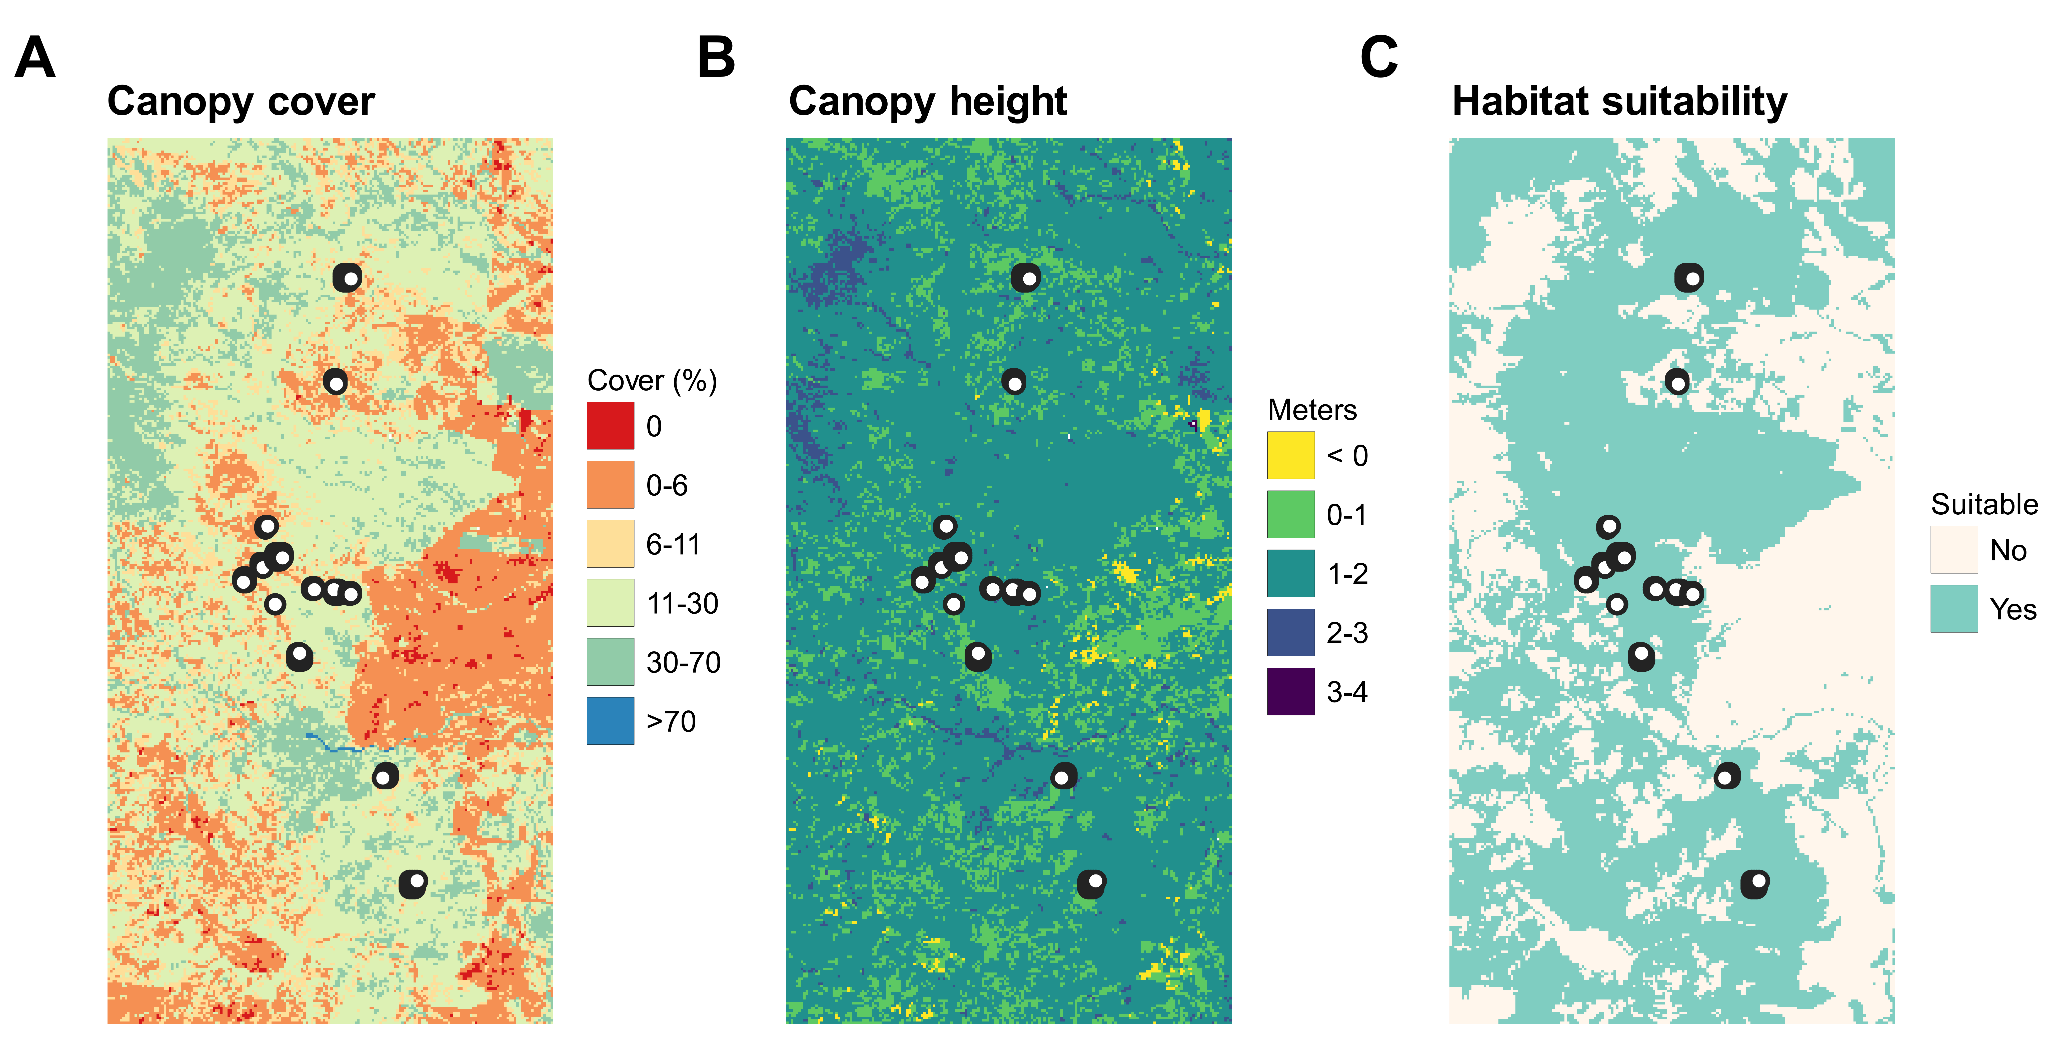


**Figure S4.** Categorical landscape variables used in the *ResistanceGA* analysis to identify barriers to gene flow across the landscape for southern black-throated finch subpopulations around the Carmichael Coal Mine (white circles indicate sample locations). A) Percentage of canopy cover reclassified into 6 classes. B) Canopy height (m) reclassified into 5 classes. C) Habitat suitability index, based on the following vegetation communities categorised as ‘suitable habitat’: Eucalypt dominated vegetation on alluvial soils, Eucalypt dominated woodland on pale-alluvial sediments and Eucalypt/*Acacia* dominated vegetation on metamorphosed sediments; and the following categorised as ‘not suitable’: *Acacia* dominated vegetation on heavy clay soils, Eucalypt/*Acacia*/*Melaleuca* dominated vegetation on skeletal soils, native grassland and non-remnant vegetation. All landscape layers have a 15km buffer around samples and a 250 m resolution.

# Supporting Methods: Effective population size

**Table S2.** List of equations used to adjust the preliminary population effective size estimates, using age at sexual maturity (α) and adult lifespan ().

| **Adjustment** | **Equation** | **Source** |
| --- | --- | --- |
| Overlapping generations |  | Waples et al. (2014); Waples et al. (2013) |
| Estimate from |  |  |
|  |  |  |

# Supporting Methods: Historical demography

**Table S3.** 1-dimensional demographic models used in the δaδi analysis to infer demographic history of black-throated finch in their southernmost range of the Desert Uplands. is in time of generations ago, and are ratios of effective population size relative to .

| **Model** | **Description** | **Parameters** |
| --- | --- | --- |
| SNM | Standard neutral model  No population size change. | None |
| 2EM | Two epoch model  Instantaneous size change to at time . | , |
| EGM | Growth model  Exponential growth/decline to beginning at time . | , |
| BGM | Bottlegrowth model  Instantaneous size change to followed by exponential growth/decline to starting at time . | , , |
| 3EM | Three epoch model  Instantaneous size change to of duration , followed by population recovery to starting at time . | , , , |
|  |  |  |

**Table S4.** Equations used to compare models in the δaδi analysis.

| **Metric** | **Equation** |
| --- | --- |
| ΔAIC |  |
| Model score |  |
| Akaike weights () |  |
|  |  |

**Table S5.** Equations used to convert δaδi parameters into biologically meaningful estimates of effective population size and time in years.

| **Parameter** | **Description** | **Equation** |
| --- | --- | --- |
|  | Effective sequence length | = no. variant sites in the SFS used in δaδi after filtering  = total alignment length (variant and invariant sites)  = no. variant sites originally detected |
|  | Ancestral effective population size | = effective mutation rate of the ancestral population  = mutation rate per site per generation for the species  = effective sequence length |
|  | Contemporary effective population size(s) | = parameter of population size from δaδi |
|  | Time in years | = generation length of the species  = parameter of time from δaδi |

# Supporting Results: SNP filtering

**Table S6.** Number of loci and samples retained after each filtering step and used in subsequent analyses.

|  | **Loci** | **Samples** | **Sites** |
| --- | --- | --- | --- |
| ***Filtering*** |  |  |  |
| Initial loci | 82,546 | 158 | 12 |
| Reproducibility | 67,328 | 158 | 12 |
| Read depth | 48,747 | 158 | 12 |
| Call Rate | 20,239 | 157 | 12 |
| MAC | 18,200 | 157 | 12 |
| Secondaries | 14,884 | 157 | 12 |
| HWE | 14,839 | 157 | 12 |
| Duplicate samples | 14,839 | 155 | 12 |
| Outlier removal | 14,808 | 155 | 12 |
| High kinship | 14,788 | 107 | 12 |
| ***Analyses*** |  |  |  |
| Neutral genetic structure & spatial analyses | 14,788 | 107 | 12 |
| Sex-biased dispersal |  |  |  |
| *Regions* | 14,788 | 107 (54 F, 53 M) | 12 |
| *Sites* | 14,749 | 97 (51 F, 46 M) | 9 |
| Historical demography | 80,382 variants | 60 (20 per region) |  |

# Supporting Results: Genetic structure and diversity

In the PCoA, South samples clustered separately from Central and North samples based on the 1st and 2nd PC’s (Figure S5). The DAPC using regions as population priors inferred = 3, with all South samples forming a distinct genetic cluster (membership probabilities (P) = 1), 40% of North samples clustering with all Central samples (P = 0.66 – 0.95) and remaining North samples clustering separately (P = 0.50 – 1.00) (Figure 1 in manuscript). The *de-novo* DAPC recovered = 2, grouping all North and Central samples, and 1 South, into a distinct genetic cluster from all other South samples (P = 1). The STRUCTURE analysis showed = 3 with the highest Delta and = 4 with the highest likelihood (Figure S6). For both = 3 and 4, all South samples formed a distinct genetic cluster, while samples in the north were only differentiated with = 4 (Figure S6).


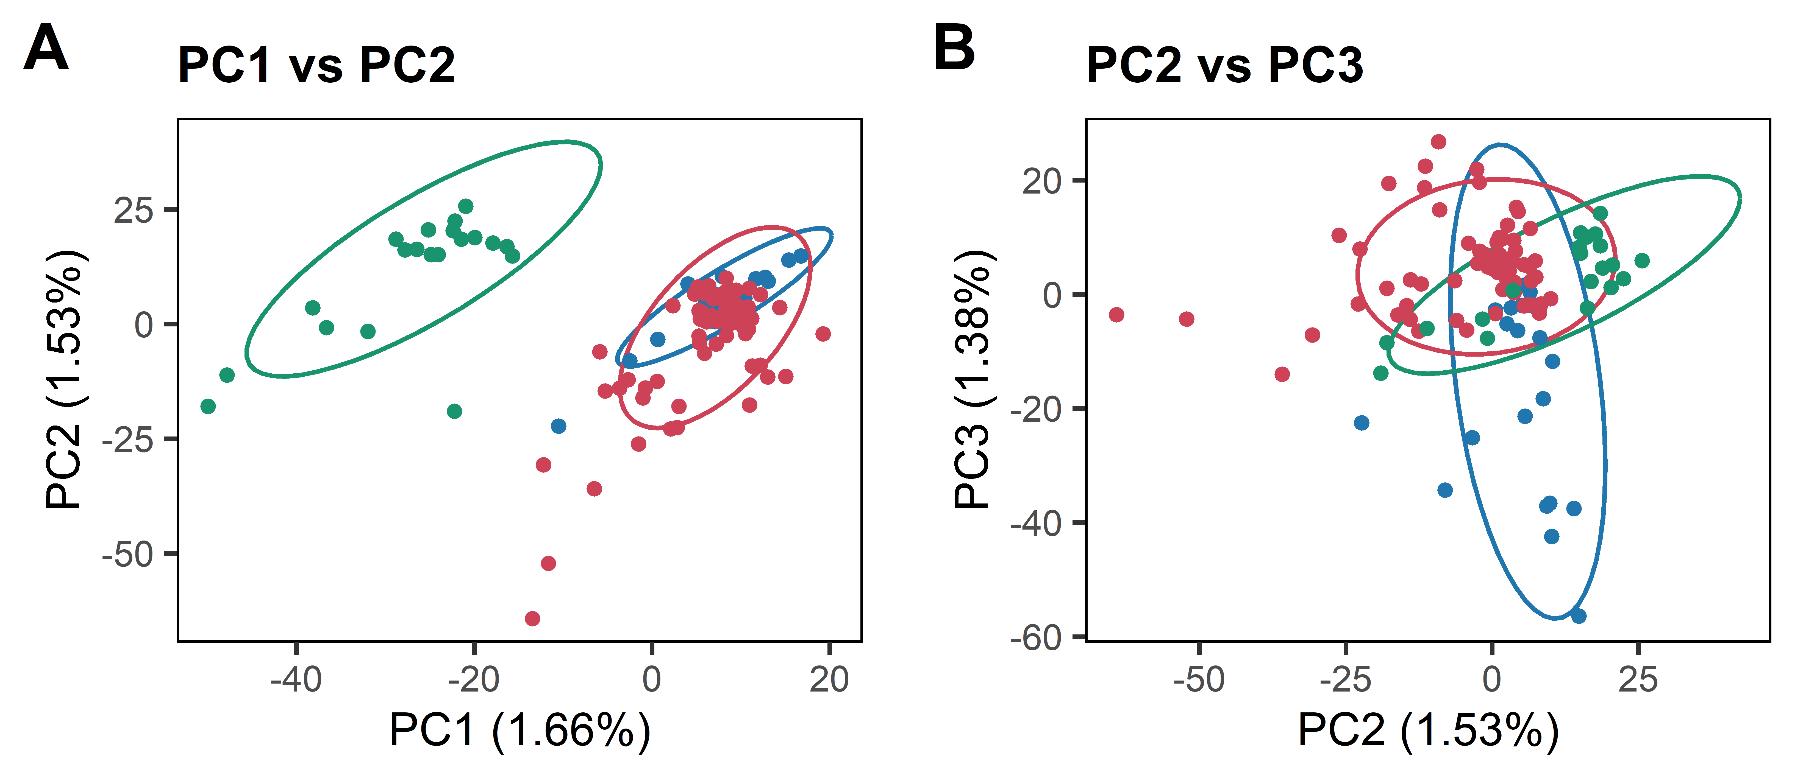


**Figure S5.** Principal coordinates analysis (PCoA) based on genotypic distance for blue-throated finches in the Desert Uplands using neutral, autosomal loci. A) 1st and 2nd PC; B) 2nd and 3rd PC. Points represent individuals, coloured by region (blue = north, red = central, green = south).


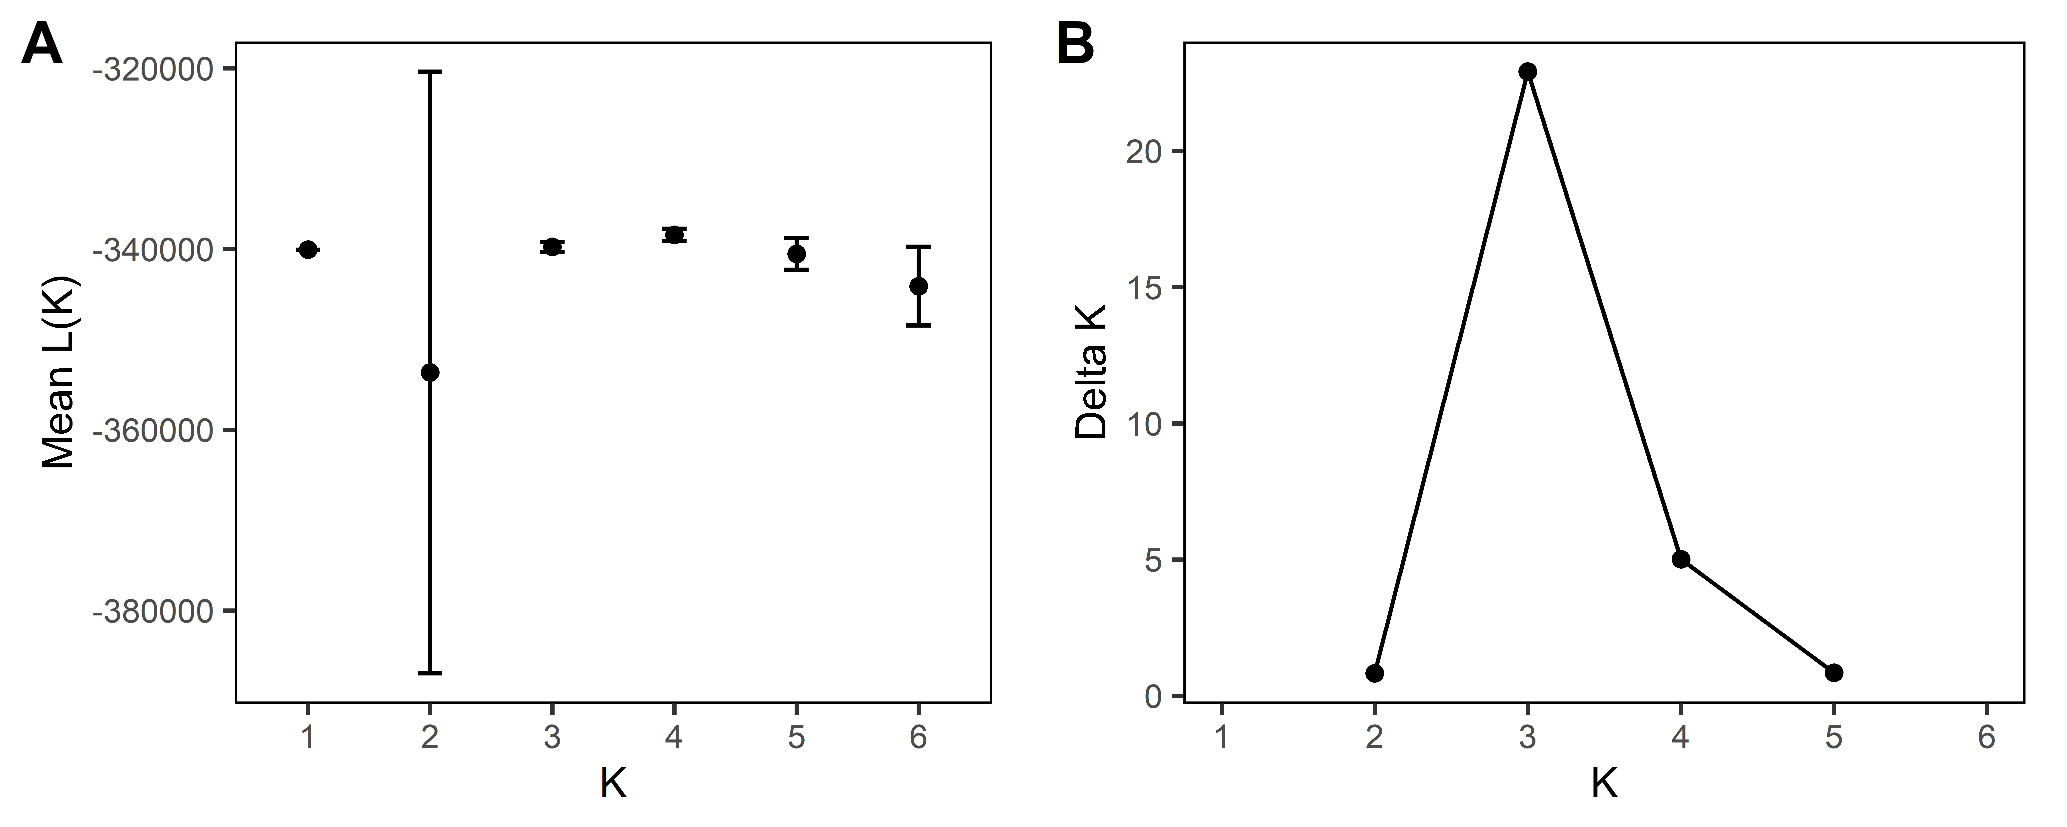


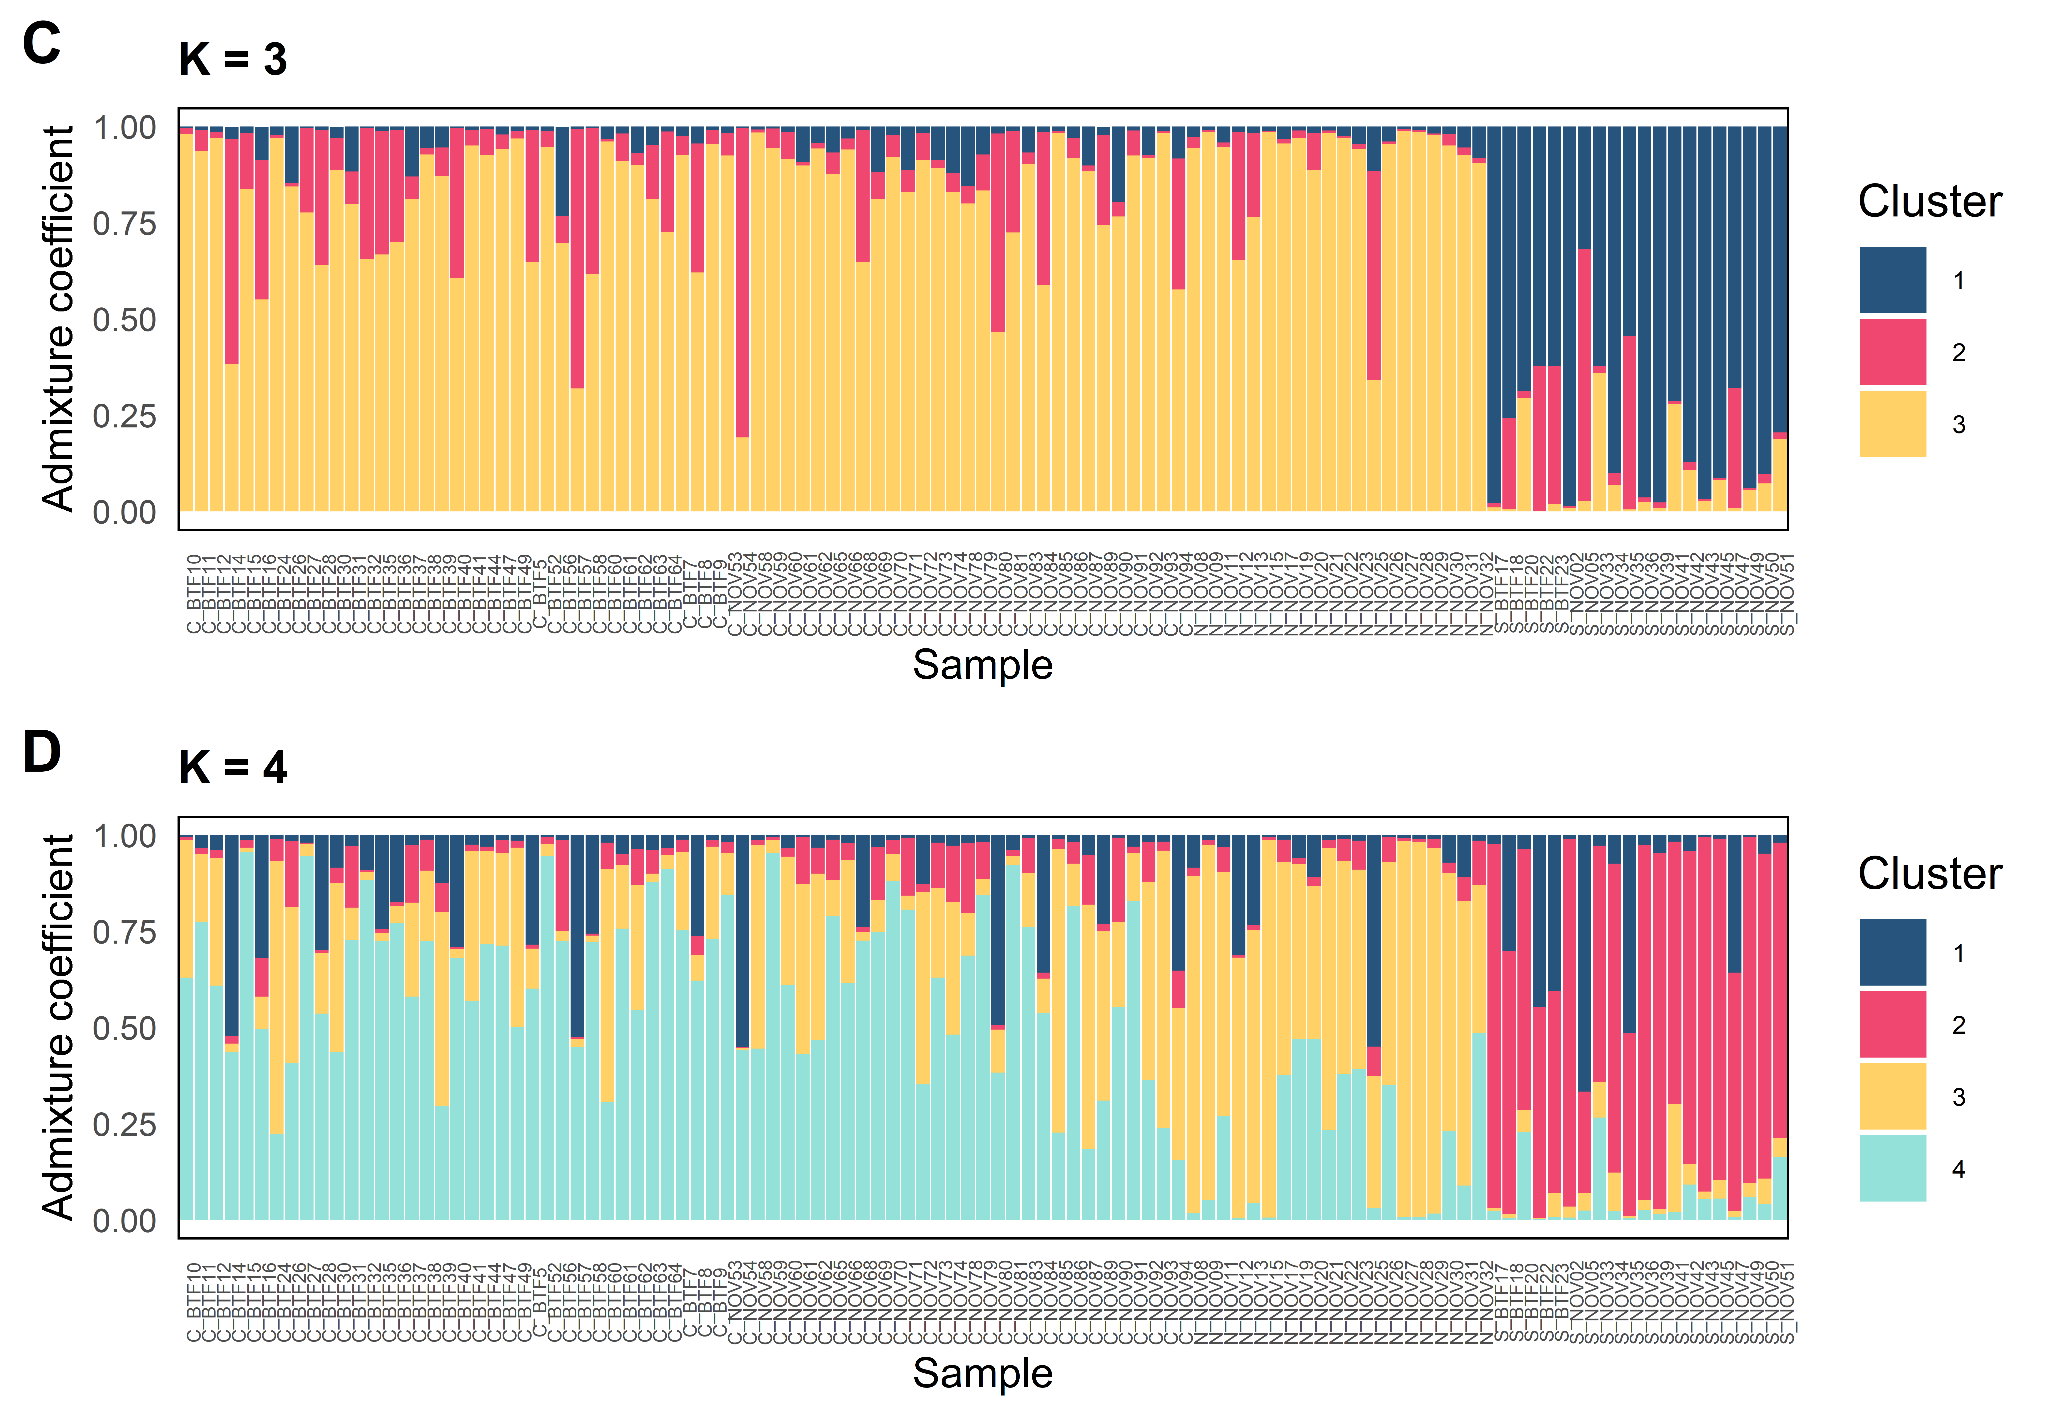


**Figure S6.** STRUCTURE results for black-throated finch using the ‘unrelated’ dataset, across 5 independent runs for 6 values of , and applying the Evanno method. A) Mean ± S.D. B) Delta = . = 4 had the highest mean , but = 3 had the highest Delta . C-D) STRUCTURE bar plot showing admixture coefficients for each individual based on = 3 or 4.


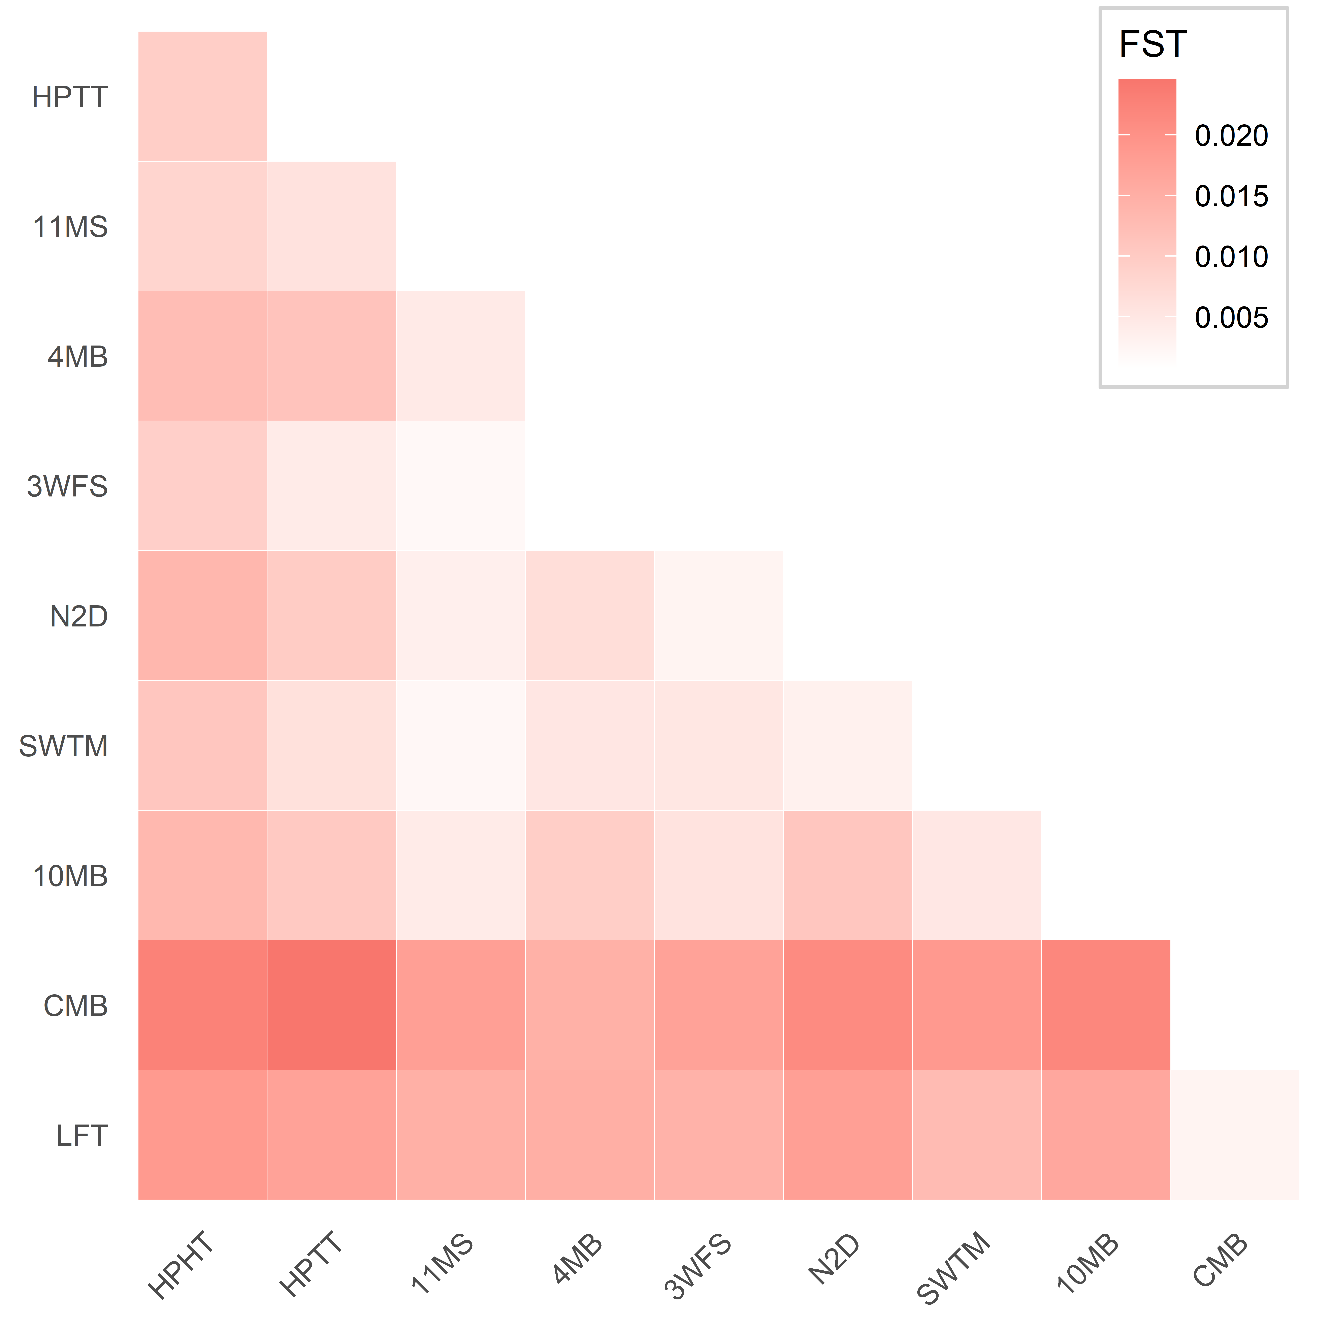


**Figure S7.** Pairwise between localities with n ≥ 5. All but one pairwise comparison (4MB and 3WFS) was significantly different from 0 (999 bootstraps).

**Table S7.** Measures of regional neutral autosomal genetic diversity for black-throated finches in the Desert Uplands. = allelic richness (accounting for differences in sample sizes, n), = observed heterozygosity, = unbiased expected heterozygosity, and = inbreeding coefficient. Bootstrapped 95% C.I.’s are shown in brackets (999 bootstraps).

|  | **n** |  |  |  |  |
| --- | --- | --- | --- | --- | --- |
| ***Region*** |  |  |  |  |  |
| North | 20 | 1.72 (1.67, 1.76) | 0.158 | 0.188 | 0.106 (0.066, 0.098) |
| Central | 67 | 1.81 (1.77, 1.83) | 0.163 | 0.194 | 0.133 (0.115, 0.128) |
| South | 20 | 1.71 (1.67, 1.75) | 0.162 | 0.191 | 0.101 (0.061, 0.092) |
| Mean |  | 1.74 | 0.161 | 0.191 |  |
| Global |  |  |  |  | 0.160 (0.157, 0.163) |

**Table S8.** Percentage of samples either assigning correctly to the region they were sampled in (i.e., no mixed ancestry), assigning to a different region (i.e., 1st generation migrant to the region they were sampled in), or having a parent, grandparent or great grandparent that migrated from a different region (i.e., recent ancestry in a different region, back to three generations ago). Only posterior probabilities of assignment > 0.5 or 0.9 are shown.

|  | North (n = 27) | | Central (n = 97) | | South (n = 31) | |
| --- | --- | --- | --- | --- | --- | --- |
|  | **P > 0.9** | **P > 0.5** | **P > 0.9** | **P > 0.5** | **P > 0.9** | **P > 0.5** |
| *Assigned to region of origin* | 7.4% | 7.4% | 97.9% | 100.0% | 22.6% | 32.3% |
| *Migrant from a different region* | | | | | | |
| North |  |  | 0.0% | 0.0% | 0.0% | 0.0% |
| Central | 81.5% | 81.5% |  |  | 29.0% | 35.5% |
| South | 0.0% | 0.0% | 0.0% | 0.0% |  |  |
| *Parent from a different region* | | | | | | |
| North |  |  | 0.0% | 0.0% | 0.0% | 0.0% |
| Central | 0.0% | 0.0% |  |  | 0.0% | 9.7% |
| South | 0.0% | 0.0% | 0.0% | 0.0% |  |  |
| *Grandparent from a different region* | | | | | | |
| North |  |  | 0.0% | 0.0% | 0.0% | 0.0% |
| Central | 11.1% | 11.1% |  |  | 16.1% | 22.6% |
| South | 0.0% | 0.0% | 0.0% | 0.0% |  |  |
| *Great grandparent from a different region* | | | | | | |
| North |  |  | 0.0% | 0.0% | 0.0% | 0.0% |
| Central | 0.0% | 0.0% |  |  | 0.0% | 0.0% |
| South | 0.0% | 0.0% | 0.0% | 0.0% |  |  |

**Table S9.** Pairs of first-degree relatives detected among black-throated finch, and the region in which they were captured within the lower Desert Uplands. Kinship coefficients were obtained with the KING method of moments, using PC-Relate to update kinship accounting for genetic structure with PC-AiR.

| Sample 1 |  |  | Sample 2 |  |  |
| --- | --- | --- | --- | --- | --- |
| ID | **Region** | **Survey** | **ID** | **Region** | **Survey** |
| C_BTF50 | Central | 2021 Dry Season | **C_BTF13** | Central | 2021 Dry Season |
| C_BTF59 | Central | 2021 Dry Season | **C_BTF14** | Central | 2021 Dry Season |
| C_BTF13 | Central | 2021 Dry Season | **C_BTF15** | Central | 2021 Dry Season |
| C_BTF50 | Central | 2021 Dry Season | **C_BTF15** | Central | 2021 Dry Season |
| C_BTF33 | Central | 2021 Dry Season | **C_BTF28** | Central | 2021 Dry Season |
| C_BTF57 | Central | 2021 Dry Season | **C_BTF53** | Central | 2021 Dry Season |
| C_BTF53 | Central | 2021 Dry Season | **C_BTF54** | Central | 2021 Dry Season |
| C_BTF57 | Central | 2021 Dry Season | **C_BTF54** | Central | 2021 Dry Season |
| C_BTF53 | Central | 2021 Dry Season | **C_BTF55** | Central | 2021 Dry Season |
| C_BTF54 | Central | 2021 Dry Season | **C_BTF55** | Central | 2021 Dry Season |
| C_BTF57 | Central | 2021 Dry Season | **C_BTF55** | Central | 2021 Dry Season |
| C_BTF5 | Central | 2021 Dry Season | **C_BTF6** | Central | 2021 Dry Season |
| C_BTF55 | Central | 2021 Dry Season | **C_NOV52** | Central | 2022 Dry Season |
| C_BTF55 | Central | 2021 Dry Season | **C_NOV54** | Central | 2022 Dry Season |
| C_NOV52 | Central | 2021 Dry Season | **C_NOV54** | Central | 2022 Dry Season |
| C_BTF55 | Central | 2021 Dry Season | **C_NOV55** | Central | 2022 Dry Season |
| C_NOV52 | Central | 2021 Dry Season | **C_NOV55** | Central | 2022 Dry Season |
| C_NOV54 | Central | 2021 Dry Season | **C_NOV55** | Central | 2022 Dry Season |
| C_BTF43 | Central | 2021 Dry Season | **C_NOV62** | Central | 2022 Dry Season |
| C_BTF34 | Central | 2021 Dry Season | **C_NOV67** | Central | 2022 Dry Season |
| C_BTF42 | Central | 2021 Dry Season | **C_NOV77** | Central | 2022 Early Wet Season |
| C_NOV91 | Central | 2021 Dry Season | **C_NOV77** | Central | 2022 Early Wet Season |
| C_BTF29 | Central | 2021 Dry Season | **C_NOV81** | Central | 2022 Wet Season |
| C_BTF46 | Central | 2021 Dry Season | **C_NOV87** | Central | 2022 Wet Season |
| C_BTF48 | Central | 2022 Dry Season | **C_NOV87** | Central | 2022 Wet Season |
| C_BTF64 | Central | 2022 Dry Season | **C_NOV88** | Central | 2022 Wet Season |
| C_BTF51 | Central | 2022 Dry Season | **C_NOV90** | Central | 2022 Wet Season |
| C_NOV57 | Central | 2022 Dry Season | **C_NOV90** | Central | 2022 Wet Season |
| C_BTF42 | Central | 2022 Early Wet Season | **C_NOV91** | Central | 2022 Early Wet Season |
| N_NOV09 | North | 2023 Wet Season | **N_NOV06** | North | 2023 Wet Season |
| N_NOV18 | North | 2023 Wet Season | **N_NOV06** | North | 2023 Wet Season |
| N_NOV09 | North | 2023 Wet Season | **N_NOV07** | North | 2023 Wet Season |
| N_NOV18 | North | 2023 Wet Season | **N_NOV28** | North | 2023 Wet Season |
| S_BTF18 | South | 2021 Dry Season | **S_BTF19** | South | 2021 Dry Season |
| S_BTF18 | South | 2021 Dry Season | **S_BTF21** | South | 2021 Dry Season |
| S_BTF19 | South | 2021 Dry Season | **S_BTF21** | South | 2021 Dry Season |
| S_BTF19 | South | 2021 Dry Season | **S_NOV03** | South | 2023 Wet Season |
| S_BTF20 | South | 2021 Dry Season | **S_NOV03** | South | 2023 Wet Season |
| S_BTF19 | South | 2021 Dry Season | **S_NOV04** | South | 2023 Wet Season |
| S_BTF20 | South | 2021 Dry Season | **S_NOV04** | South | 2023 Wet Season |
| S_NOV03 | South | 2023 Wet Season | **S_NOV04** | South | 2023 Wet Season |
| S_NOV42 | South | 2022 Dry Season | **S_NOV38** | South | 2022 Dry Season |
| S_NOV35 | South | 2022 Dry Season | **S_NOV40** | South | 2022 Dry Season |
| S_NOV34 | South | 2022 Dry Season | **S_NOV44** | South | 2022 Dry Season |


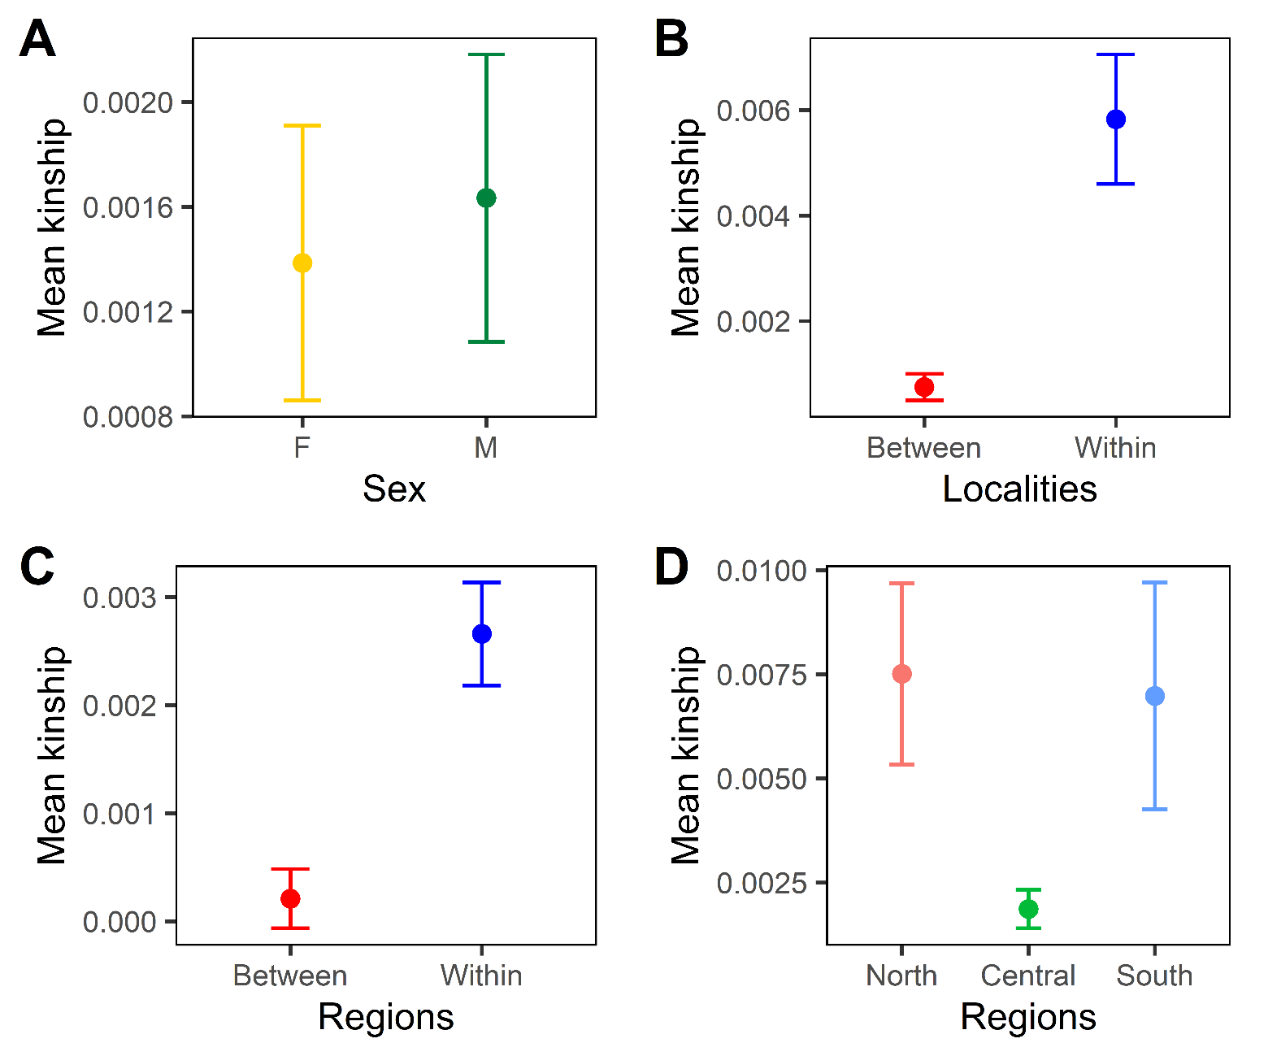


**Figure S8.** Mean kinship among black-throated finch compared A) between sexes, B) within versus between localities, C) within versus between regions, and D) between each region. Kinship was estimated with KING accounting for genetic structure with PC-AiR and PC-Relate, using neutral, autosomal loci and the ‘unrelated’ dataset (no full- or half-sibs).


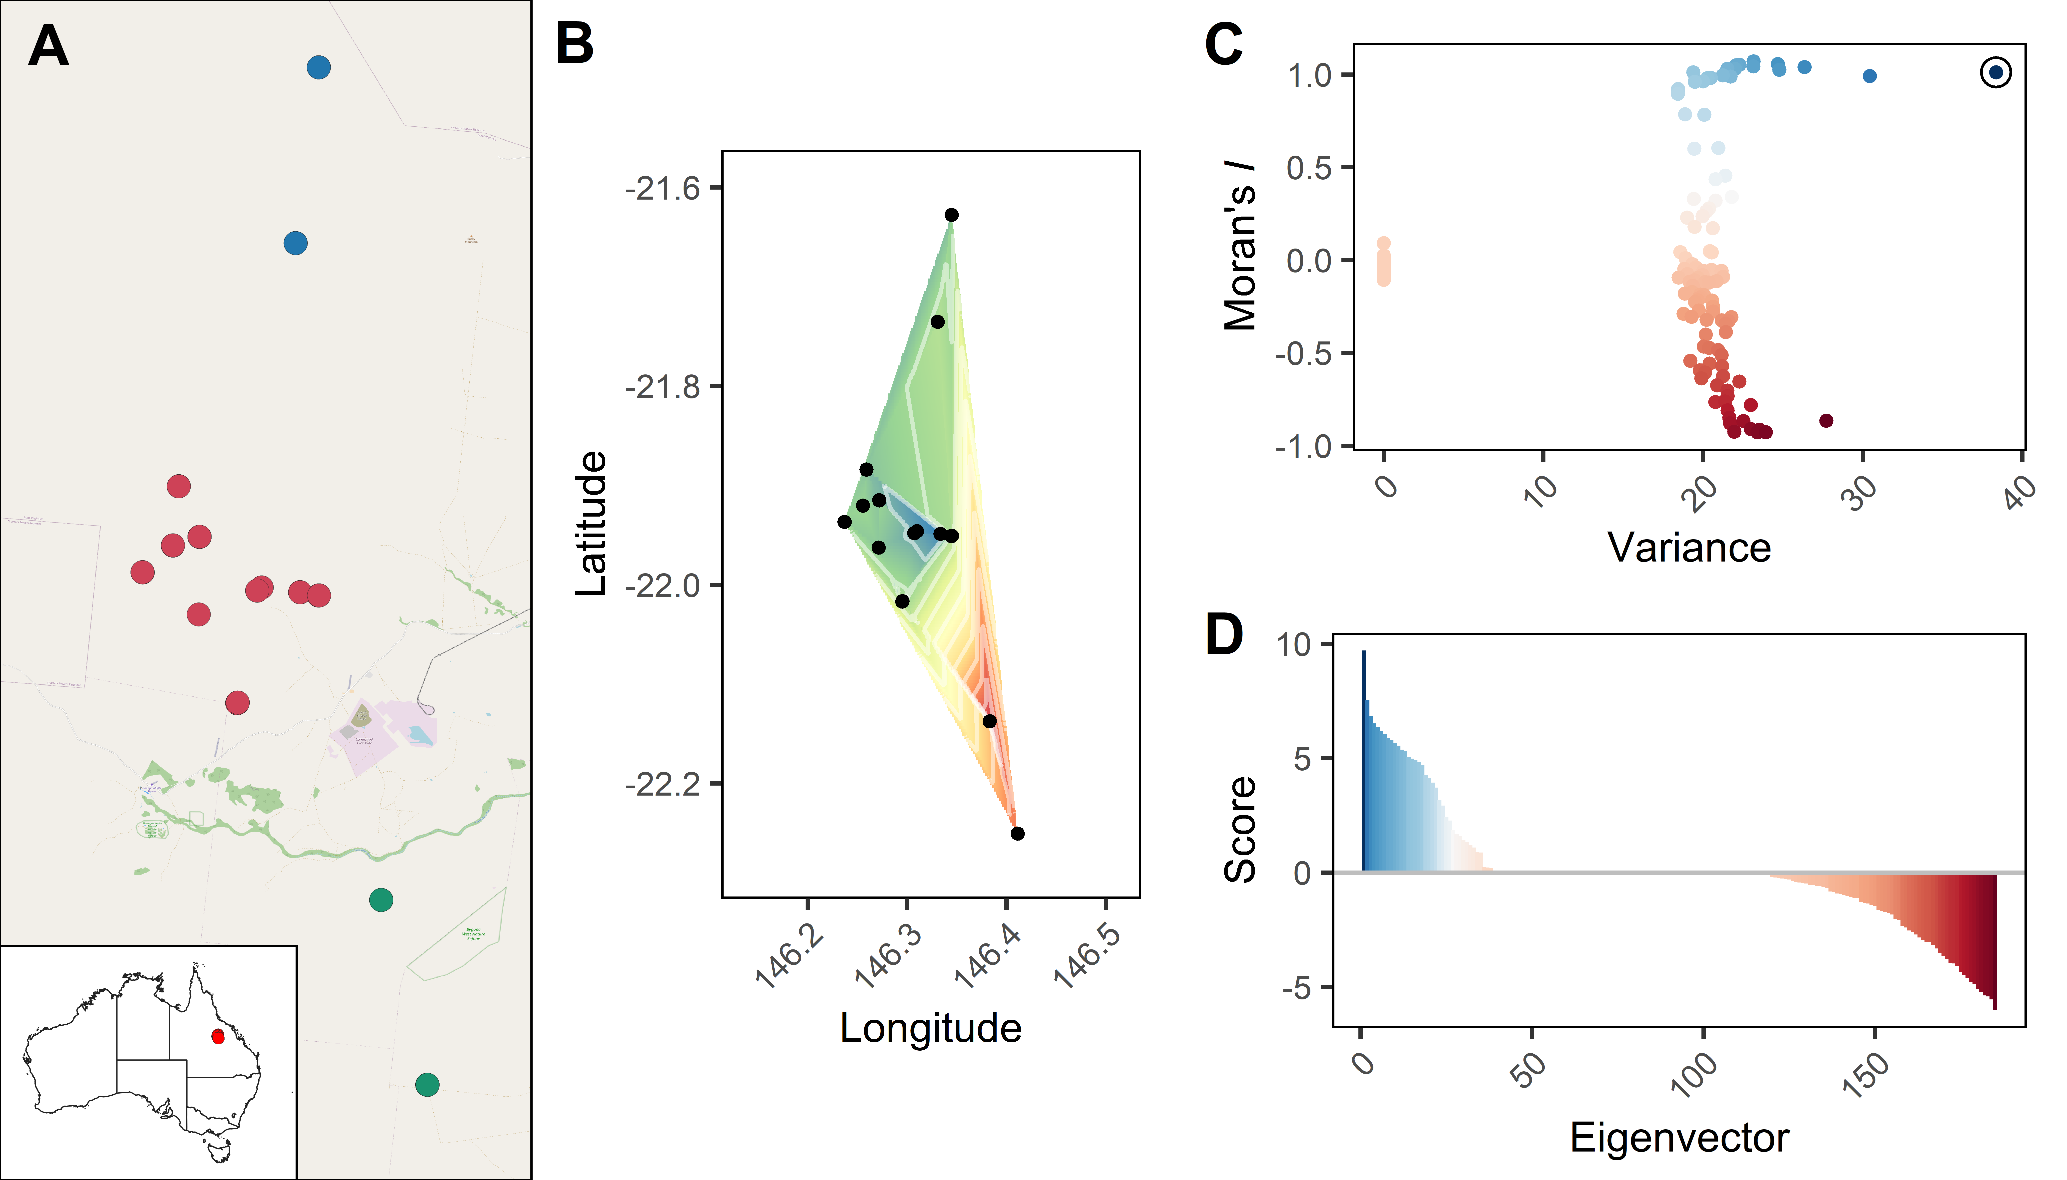


**Figure S9.** Spatial principal coordinates analysis (sPCA) for black-throated finches across their distribution in the lower Desert Uplands. A) Geographic location of samples coloured by region (blue = north, red = central, green = south). B) Map of interpolated individual scores (blue = low, red = high) based on the first PC (first global score). Contour lines that are closer together indicate greater genetic differentiation between localities. C) Plot of decomposed genetic variation into variance (due to population structure) and Moran’s *I* (spatial autocorrelation) (blue = global structure, red = local structure), with the top global score circled. D) Distribution of eigenvectors from the most positive (blue = global structure) to negative (red = local structure).


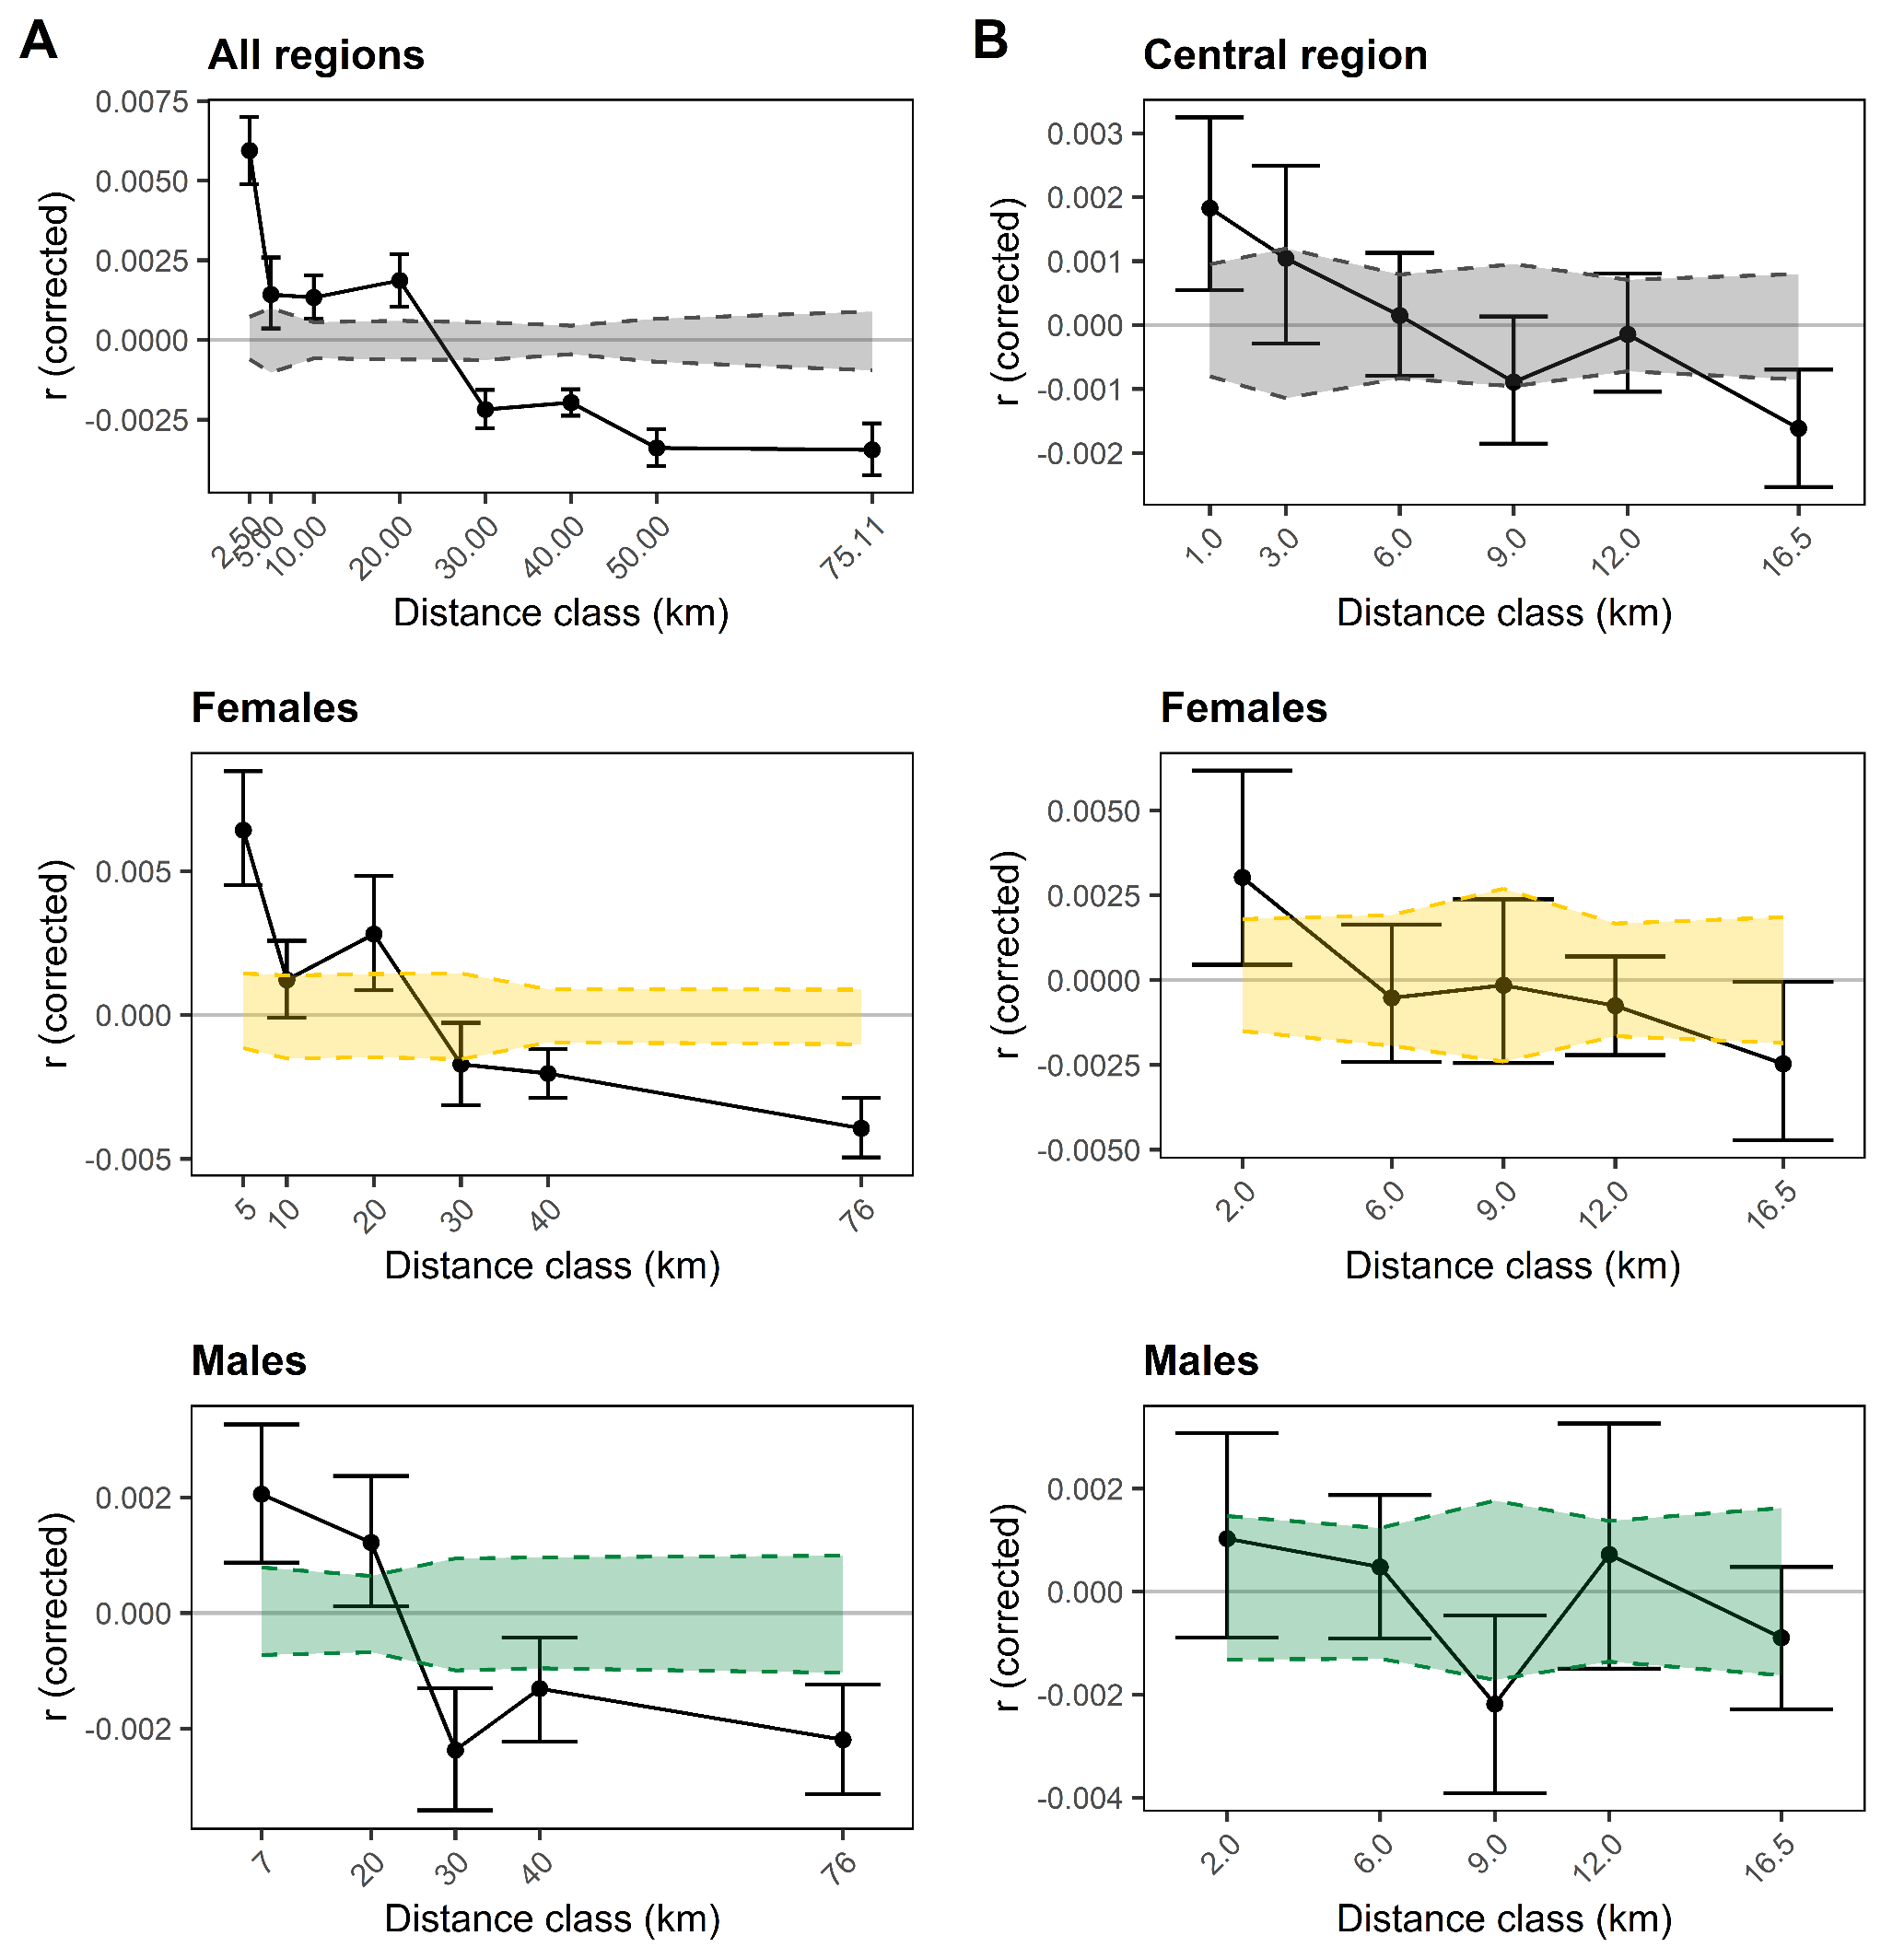


**Figure S10.** Spatial correlograms for black-throated finch in the Desert Uplands based on neutral autosomal loci, for A) all ‘unrelated’ samples, and B) samples within the central region. Irregular distance classes were chosen to maximise sample size per distance class, solid error bars denote 95% bootstrapped C.I. about the mean r within each distance class (999 bootstraps), dashed line denotes the 95% C.I. for the hypothesis of ‘no spatial structure’ (999 permutations).

**Table S10.** Mean (± 95% C.I.) kinship coefficients among unrelated finches (no first or second degree relatives) compared within versus between sexes, localities and regions for black-throated finches. Values in bold are significantly higher than other comparisons (p < 0.05) based on permutation tests (1000 permutations) for each set (sex, localities, regions).

|  | **Mean** | **Lower** | **Upper** |
| --- | --- | --- | --- |
| ***Sex*** |  |  |  |
| Between females | 0.0014 | 0.0009 | 0.0019 |
| Between males | 0.0016 | 0.0011 | 0.0022 |
| Between sexes | 0.0012 | 0.0008 | 0.0015 |
| ***Localities*** |  |  |  |
| Between | 0.0008 | 0.0005 | 0.0010 |
| Within | 0.0059 | 0.0047 | 0.0072 |
| ***Regions*** |  |  |  |
| Between | 0.0002 | -0.0001 | 0.0005 |
| Within | 0.0027 | 0.0029 | 0.0031 |
| ***Within regions*** |  |  |  |
| North | 0.0075 | 0.0054 | 0.0097 |
| Central | 0.0019 | 0.0014 | 0.0023 |
| South | 0.0070 | 0.0043 | 0.0097 |

# Supporting Results: EEMS


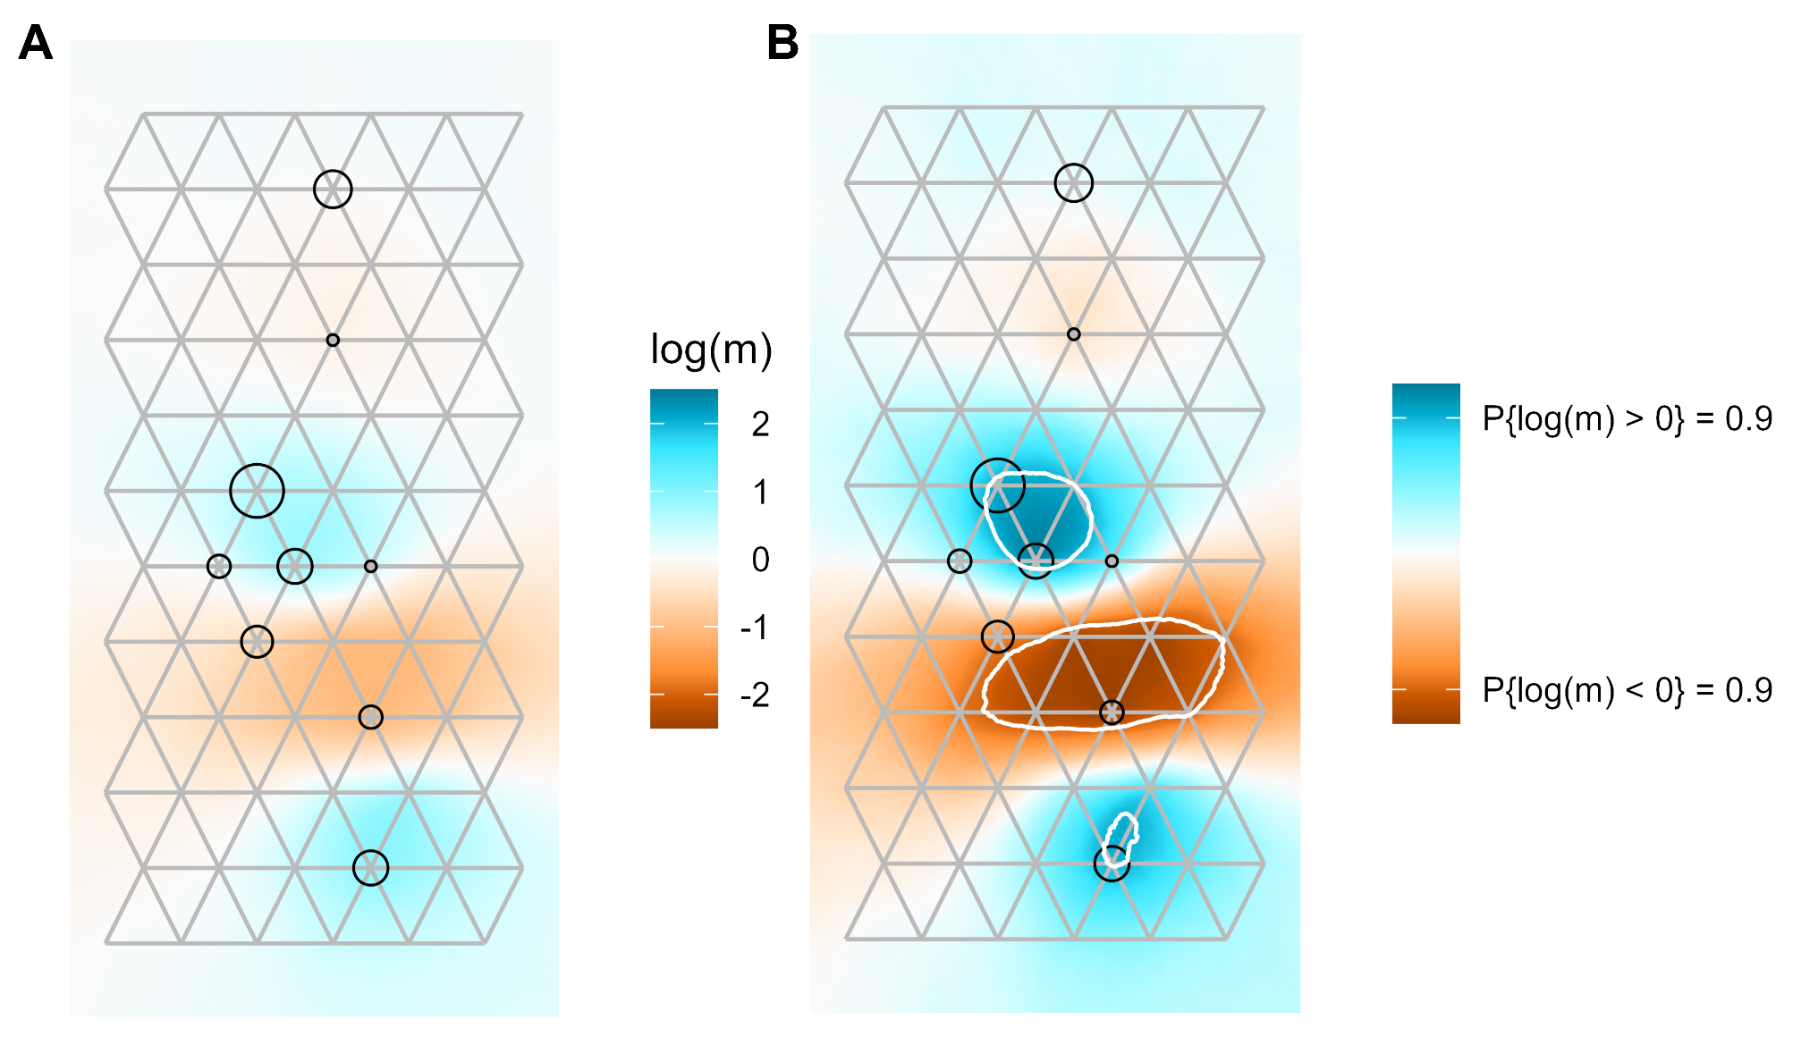


**Figure S11.** Estimated effective migration rates calculated by EEMS. A) Plot of interpolated posterior mean migration rates *m* (log10 scale) showing areas of higher than expected (blue) or lower than expected migration rates (orange). Circles indicate sampling locations with size depicting the number of samples per deme. B) Plot showing highlighted regions (white outline) where effective migration rates are significantly higher (blue) or lower (orange) than the overall average rate of migration.

# Supporting Results: ResistanceGA

**Table S11.** Bootstrap results compared between two independent replicate runs of the single resistance surface optimization procedure implemented by *ResistanceGA* for black-throated finch. ( corrected for small sample sizes) is the average value obtained for each model in 1,000 bootstrap iterations; is the number of parameters; is the difference in between the top model (lowest ) and each subsequent model; and is the average marginal of 1,000 bootstrap iterations.

|  |  | Run 1 |  |  | Run 2 |  |  |
| --- | --- | --- | --- | --- | --- | --- | --- |
| Predictor |  |  |  |  |  |  |  |
| Habitat suitability | 3 | -33801.07 | 0 | 0.17 | -33801.07 | 0 | 0.17 |
| Canopy cover | 7 | -33787.26 | 13.81 | 0.17 | -33787.37 | 13.70 | 0.17 |
| Wet season bare earth | 4 | -33700.37 | 100.71 | 0.24 | -33700.37 | 100.71 | 0.24 |
| Wet season distance to water | 4 | -33699.72 | 101.35 | 0.25 | -33701.52 | 99.55 | 0.23 |
| Dry season bare earth | 4 | -33674.96 | 126.11 | 0.22 | -33674.96 | 126.11 | 0.22 |
| Canopy height | 6 | -33647.08 | 153.99 | 0.13 | -33648.01 | 153.06 | 0.13 |
| Dry season distance to water | 4 | -33636.83 | 164.24 | 0.15 | -33638.93 | 162.14 | 0.16 |
| Geographic distance | 2 | -33613.63 | 187.45 | 0.10 | -33613.63 | 187.45 | 0.10 |
| Null model | 1 | -33035.88 | 765.19 | 0.00 | -33035.88 | 765.19 | 0.00 |

**Table S12.** Bootstrapping results for the top multi-surface resistance models, sorted by ( corrected for small sample sizes). is the average value obtained for each model in 1,000 bootstrap iterations; is the number of parameters; is the difference in between the top model (lowest ) and each subsequent model; is the average Akaike weight; is the average marginal of 1,000 bootstrap iterations; and % top is the percentage of 1,000 bootstrap iterations each model was the top model. HS = habitat suitability, WB = wet season distance to water, CH = canopy height, DE = dry season bare earth, WE = wet season bare earth, DB = dry season distance to water, CC = canopy cover and distance = geographic distance only.

| Predictor |  |  |  |  |  | % Top |
| --- | --- | --- | --- | --- | --- | --- |
| HS | 3 | -18637.3 | 0.00 | 0.44 | 0.173 | 53.1 |
| HS.WB | 6 | -18635.9 | 1.39 | 0.19 | 0.188 | 28.2 |
| HS.WB.CH | 9 | -18634.8 | 2.51 | 0.15 | 0.178 | 15.8 |
| HS.WB.DE | 7 | -18633.1 | 4.14 | 0.06 | 0.191 | 0.0 |
| HS.WB.WE | 7 | -18633.1 | 4.18 | 0.05 | 0.191 | 0.0 |
| HS.WB.DB | 7 | -18633.1 | 4.20 | 0.06 | 0.192 | 0.0 |
| HS.CC | 9 | -18631.9 | 5.36 | 0.06 | 0.176 | 2.9 |
| Distance | 2 | -18538.2 | 99.09 | 0.00 | 0.102 | 0.0 |

# Supporting Results: Effective population size

**Table S13.** Estimates of the effective number of breeders () accounting for overlapping generations, and effective population size (), under different estimates of age at sexual maturity (α) and adult lifespan () in years. Lower and upper give the 95% jack-knifed confidence intervals. Estimates are rounded to the nearest tenth digit.

|  |  |  |  |  |
| --- | --- | --- | --- | --- |
| *Mean* | **α = 0.5** | **α = 1.0** | **α = 0.5** | **α = 1.0** |
| = 4 | 1,260 | 1,440 | 1,470 | 1,360 |
| = 5 | 1,220 | 1,370 | 1,510 | 1,390 |
| = 6 | 1,190 | 1,320 | 1,550 | 1,420 |
| = 7 | 1,170 | 1,290 | 1,580 | 1,450 |
| = 8 | 1,150 | 1,260 | 1,610 | 1,470 |
| *Lower* |  |  |  |  |
| = 4 | 1,030 | 1,180 | 1,210 | 1,110 |
| = 5 | 1,000 | 1,130 | 1,240 | 1,140 |
| = 6 | 970 | 1,090 | 1,270 | 1,170 |
| = 7 | 960 | 1,060 | 1,290 | 1,190 |
| = 8 | 940 | 1,030 | 1,320 | 1,210 |
| *Upper* |  |  |  |  |
| = 4 | 1,610 | 1,840 | 1,880 | 1,740 |
| = 5 | 1,560 | 1,760 | 1,930 | 1,780 |
| = 6 | 1,520 | 1,690 | 1,980 | 1,820 |
| = 7 | 1,490 | 1,650 | 2,020 | 1,850 |
| = 8 | 1,470 | 1,610 | 2,050 | 1,880 |

# Supporting Results: Historical demography

**Table S14.** Demographic parameters for each model tested in δaδi. is the ancestral mutation rate in units of ( = ancestral effective population size, = mutation rate per site per generation, = effective sequence length). (historical population size during expansion or bottleneck) and (contemporary size) are ratios of population size relative to . (bottleneck duration) and (time since recovery) are measures of time in units of ( = generation length). Best-fit model is shaded in grey based on the log likelihood score (), Akaike information criterion (), model score ()), and Akaike weight ().

| **Model** |  |  |  | **Model score** |  |  |  |  |  |  |
| --- | --- | --- | --- | --- | --- | --- | --- | --- | --- | --- |
| SNM | -1,522.1 | 3,044 | 2,319 | 0.00 | <0.0001 | 12,180 | – | – | – | – |
| EGM | -1,093.6 | 2,191 | 1,465 | 0.37 | <0.0001 | 12,918 | – | 0.01 | – | 7x10-05 |
| BGM | -444.7 | 895 | 170 | 0.93 | <0.0001 | 9,746 | 44.64 | 0.66 | – | 0.38 |
| 2EM | -1,430.3 | 2,865 | 2,139 | 0.08 | <0.0001 | 10,036 | – | 1.29 | – | 0.99 |
| 3EM | -358.8 | 726 | 0 | 1.00 | 1.00 | 8,346 | 2.09 | 0.01 | 0.99 | 1.8x10-04 |

**Table S15.** Demographic parameters for the best-fit model inferred by δaδi (3EM, 3 epoch model) for black-throated finches (BTF), converted into estimates of effective population size () and time in years. Conversion used an approximate mutation rate per site per generation of = 5.8510-9 based on zebra finches(Bergeron et al., 2023) and a generation length of 2 or 3.5 years for BTF (Bird et al., 2020; Garnett et al., 2011). = ancestral effective population size, = historical population size during expansion or bottleneck, = contemporary size after population recovery, = expansion or bottleneck duration, and = time since recovery to . L and U are the lower and upper 95% C.I.’s based on 100 bootstraps.

|  |  |  |  |  |  |  |
| --- | --- | --- | --- | --- | --- | --- |
| 2.0 | Mean | 80,354 | 167,700 | 918 | 321,081 | 59 |
|  | Lower 95% C.I. | 63,863 | 144,350 | 754 | 103,172 | 49 |
|  | Upper 95 % C.I. | 96,846 | 191,051 | 1,083 | 538,991 | 69 |
| 3.5 | Mean | 80,354 | 167,700 | 918 | 561,892 | 103 |
|  | Lower 95% C.I. | 63,863 | 144,350 | 754 | 180,550 | 86 |
|  | Upper 95 % C.I. | 96,846 | 191,051 | 1,083 | 943,234 | 121 |


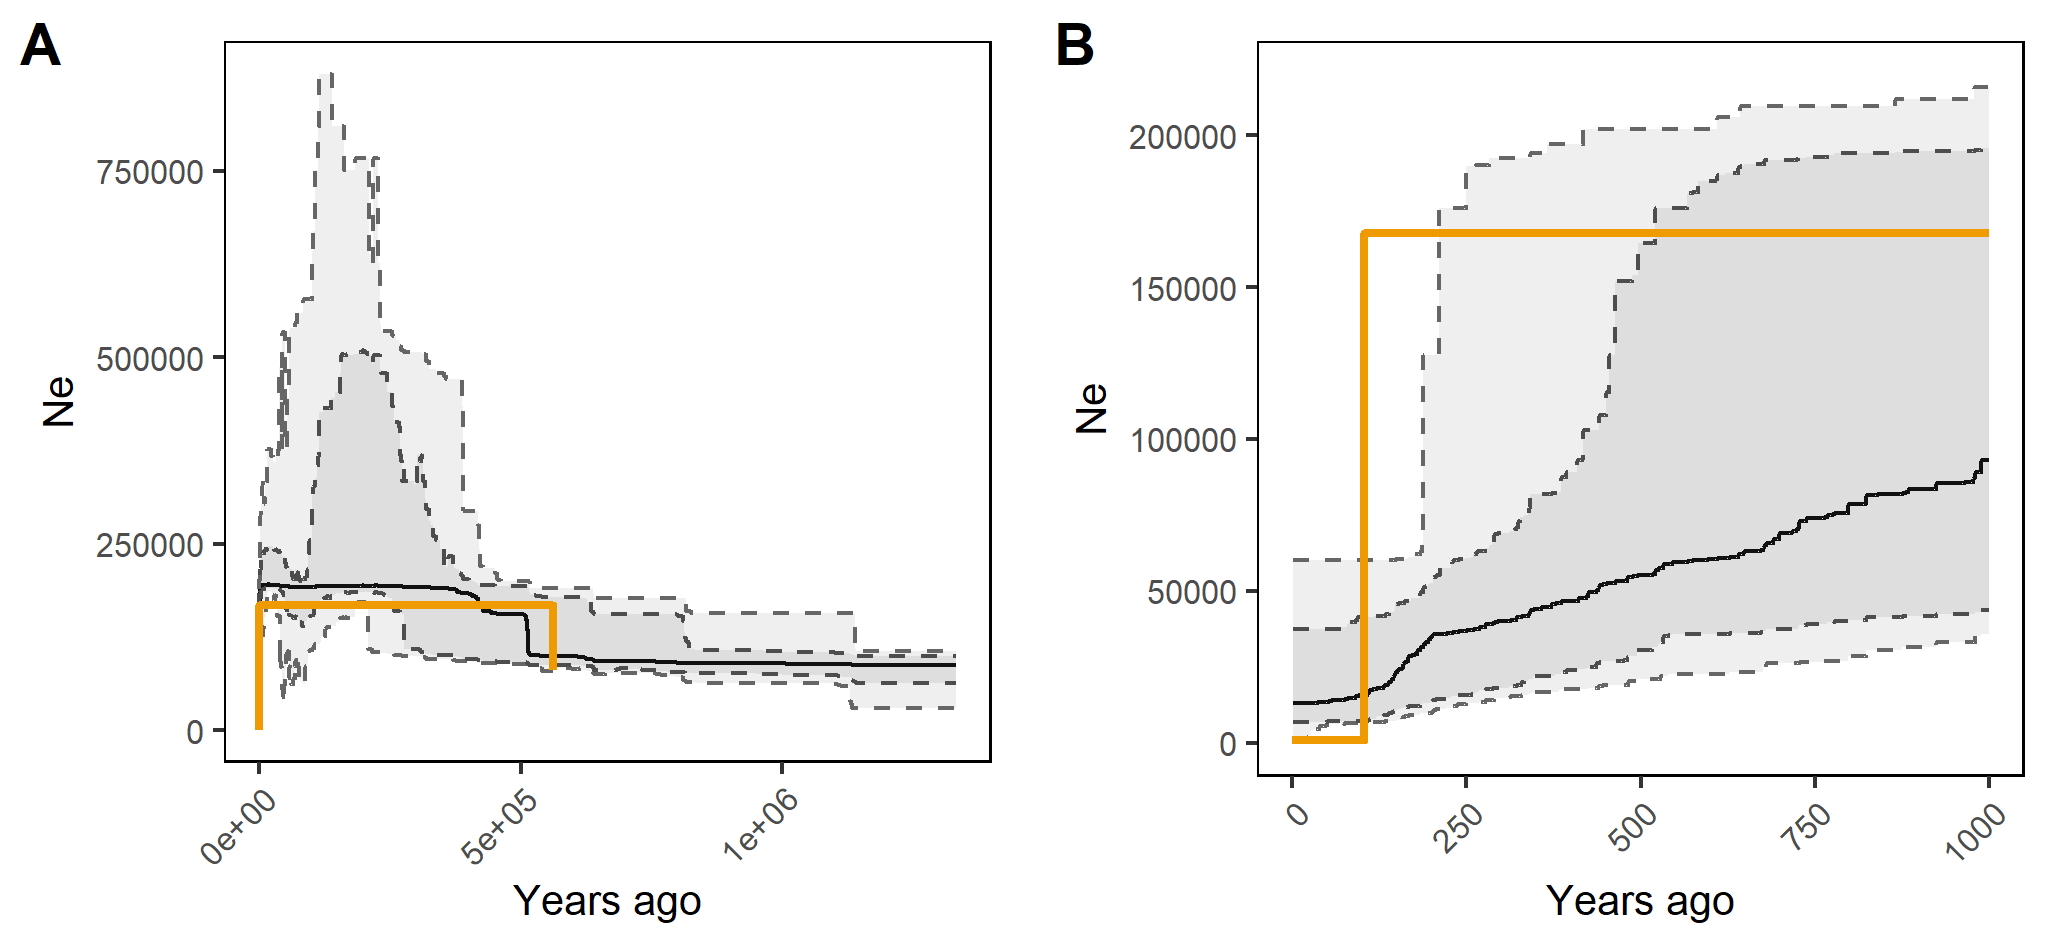


**Figure S12.** Stairway plot showing historical changes in the median effective population size () of black-throated finches in the southern Desert Uplands, over A) the last million years and B) the last 1,000 years, with shaded polygons representing the 95% C.I.’s (light grey) and 75% C.I.’s (dark grey). Demographic events inferred by δaδi (best-fit model = 3 epoch) are indicated in orange. Results for both approaches are shown based on a mutation rate per site per generation of 5.8510-9 and a generation length () of 3.5 years.

# Literature Cited

Bergeron, L. A., Besenbacher, S., Zheng, J., Li, P., Bertelsen, M. F., Quintard, B., Hoffman, J. I., Li, Z., St. Leger, J., & Shao, C. (2023). Evolution of the germline mutation rate across vertebrates. *Nature*, *615*(7951), 285-291.

Bird, J. P., Martin, R., Akçakaya, H. R., Gilroy, J., Burfield, I. J., Garnett, S. T., Symes, A., Taylor, J., Şekercioğlu, Ç. H., & Butchart, S. H. (2020). Generation lengths of the world's birds and their implications for extinction risk. *Conservation biology*, *34*(5), 1252-1261.

Garnett, S. T., Szabo, J. K., & Duston, G. (2011). *The Action Plan for Australian Birds 2010*. CSIRO.

Robledo‐Ruiz, D. A., Austin, L., Amos, J. N., Castrejón‐Figueroa, J., Harley, D. K., Magrath, M. J., Sunnucks, P., & Pavlova, A. (2023). Easy‐to‐use R functions to separate reduced‐representation genomic datasets into sex‐linked and autosomal loci, and conduct sex assignment. *Molecular Ecology Resources*.

Scrucca, L., Fop, M., Murphy, T. B., & Raftery, A. E. (2016). mclust 5: clustering, classification and density estimation using Gaussian finite mixture models. *The R journal*, *8*(1), 289.

Sigeman, H., Strandh, M., Proux-Wéra, E., Kutschera, V. E., Ponnikas, S., Zhang, H., Lundberg, M., Soler, L., Bunikis, I., & Tarka, M. (2021). Avian neo-sex chromosomes reveal dynamics of recombination suppression and W degeneration. *Molecular Biology and Evolution*, *38*(12), 5275-5291.

Smeds, L., Kawakami, T., Burri, R., Bolivar, P., Husby, A., Qvarnström, A., Uebbing, S., & Ellegren, H. (2014). Genomic identification and characterization of the pseudoautosomal region in highly differentiated avian sex chromosomes. *Nature communications*, *5*(1), 5448.

van Osta, J. M., Dreis, B., Grogan, L. F., & Castley, J. G. (2024). Local resource availability drives habitat use by a threatened avian granivore in savanna woodlands. *PLoS ONE*, *19*(8), e0306842.

Waples, R. S., Antao, T., & Luikart, G. (2014). Effects of overlapping generations on linkage disequilibrium estimates of effective population size. *Genetics*, 10.1534/genetics.1114.164822.

Waples, R. S., Luikart, G., Faulkner, J. R., & Tallmon, D. A. (2013). Simple life-history traits explain key effective population size ratios across diverse taxa. *Proceedings of the Royal Society of London B: Biological Sciences*, *280*(1768), 20131339.
